# Supplementary material
Source: publisher site journal article supplement (https://www.dovepress.com/article/599370)
Supplement: Supplementary file 1 [file 599370%20Supplementary%20Tables%201-11.docx]

**Contents**

**Table S1.** The global burden of COPD attributable to smoking for 204 countries or territories in 1990 and 2021 and the temporal trends during 1990–2021

**Table S2.** Top 10 countries or territories exhibiting the highest number of COPD deaths attributable to smoking in 1990 and 2021

**Table S3.** Top 10 countries or territories exhibiting the highest number of COPD DALYs attributable to smoking in 1990 and 2021

**Table S4.** Top 10 countries or territories exhibiting the highest COPD ASMR per 100,000 attributable to smoking in 1990 and 2021

**Table S5.** Top 10 countries or territories exhibiting the highest COPD ASDR per 100,000 attributable to smoking in 1990 and 2021

**Table S6.** Top 10 countries or territories exhibiting the highest or lowest EAPC in COPD ASMR per 100,000 attributable to smoking from 1990 to 2021

**Table S7.** Top 10 countries or territories exhibiting the highest or lowest EAPC in COPD ASDR per 100,000 attributable to smoking from 1990 to 2021

**Table S8.** DALYs of smoking-related COPD with decomposition analysis, categorized by global and SDI regions

**Table S9.** Projections for ASMR, 2022-2040

**Table S10.** Projections for ASDR, 2022-2040

**Table S11.** Out-of-Sample Prediction Errors of BAPC Models Across Sex Groups

**Table S1.** The global burden of COPD attributable to smoking for 204 countries or territories in 1990 and 2021 and the temporal trends during 1990–2021

| **location** | **1990** | | | | **2021** | | | | **EAPC** | |
| --- | --- | --- | --- | --- | --- | --- | --- | --- | --- | --- |
| **Death cases**  **No.×102 (95% *UI*)** | **ASMR per 105**  **No. (95% *UI*)** | **DALYs**  **No.×102 (95% *UI*)** | **ASDR per 105**  **No. (95% *UI*)** | **Death cases**  **No.×102 (95% *UI*)** | **ASMR per 105**  **No. (95% *UI*)** | **DALYs**  **No.×102 (95% *UI*)** | **ASDR per 105**  **No. (95% *UI*)** | **ASMR**  **No. (95% *CI*)** | **ASDR**  **No. (95% *CI*)** |
| Afghanistan | 5 (2,8) | 7.86 (4.13,12.52) | 125 (71,192) | 183.03 (103.06,283.38) | 6 (4,8) | 7.37 (4.65,10.7) | 167 (112,235) | 172.96 (115.73,241.87) | -0.22 (-0.67,0.23) | -0.27 (-0.7,0.17) |
| Albania | 3 (3,4) | 20.46 (15.54,25.77) | 70 (55,85) | 382.93 (295.49,468.48) | 3 (2,5) | 7.96 (5.38,11.14) | 74 (55,97) | 169.3 (124.06,221.67) | -3.04 (-3.48,-2.59) | -2.55 (-2.91,-2.18) |
| Algeria | 8 (5,10) | 11.01 (7.9,14.55) | 200 (150,259) | 207.27 (154.56,267.55) | 19 (13,25) | 8.22 (5.69,11.03) | 492 (373,621) | 164.6 (123.82,208.44) | -0.64 (-0.8,-0.49) | -0.62 (-0.69,-0.55) |
| American Samoa | 0 (0,0) | 25.68 (18.37,32.77) | 1 (1,1) | 546.29 (408.42,685.75) | 0 (0,0) | 13.65 (10.1,17.74) | 1 (1,2) | 306.62 (233.98,394.87) | -2.36 (-2.51,-2.21) | -2.15 (-2.29,-2.01) |
| Andorra | 0 (0,0) | 15.93 (10.64,22.67) | 2 (1,3) | 331.99 (235.89,451.25) | 0 (0,0) | 7.01 (4.53,10.08) | 3 (2,3) | 161.02 (110.82,217.22) | -2.54 (-2.85,-2.23) | -2.26 (-2.5,-2.01) |
| Angola | 3 (2,5) | 10.81 (6.79,15.17) | 96 (63,133) | 257.44 (167.73,350.84) | 5 (3,7) | 5.57 (3.78,7.54) | 159 (114,213) | 139.12 (98.98,184.69) | -2.29 (-2.42,-2.17) | -2.13 (-2.27,-1.99) |
| Antigua and Barbuda | 0 (0,0) | 1.31 (0.93,1.75) | 0 (0,0) | 32.44 (23.49,42.27) | 0 (0,0) | 1.73 (1.24,2.26) | 0 (0,1) | 41.67 (30.28,53.68) | 0.6 (0.37,0.84) | 0.52 (0.35,0.7) |
| Argentina | 29 (23,36) | 9.2 (7.06,11.4) | 740 (588,885) | 226.76 (179.49,271.42) | 41 (30,52) | 7.07 (5.2,9) | 932 (708,1153) | 166.77 (127.35,206.09) | -0.72 (-1.03,-0.41) | -0.92 (-1.17,-0.66) |
| Armenia | 5 (4,5) | 19.53 (16.72,21.97) | 111 (97,125) | 418.59 (362.82,471.67) | 3 (2,3) | 5.91 (4.87,6.99) | 58 (48,67) | 131.77 (110.66,153.95) | -3.64 (-4.17,-3.11) | -3.77 (-4.19,-3.35) |
| Australia | 23 (18,28) | 11.12 (8.71,13.79) | 519 (408,630) | 255.8 (201.53,311.84) | 21 (15,28) | 4.16 (3,5.56) | 441 (326,572) | 96.58 (72,124.42) | -3.3 (-3.57,-3.04) | -3.26 (-3.49,-3.03) |
| Austria | 8 (6,10) | 6.27 (4.88,7.64) | 188 (150,227) | 159.07 (128.36,190.7) | 11 (9,15) | 5.87 (4.44,7.35) | 276 (215,344) | 155.59 (121.55,191.03) | 0.08 (-0.14,0.31) | 0.19 (0.02,0.36) |
| Azerbaijan | 4 (4,6) | 9.79 (7.65,12.33) | 117 (93,144) | 232.2 (184.68,285.79) | 5 (4,6) | 5.59 (4.24,7.54) | 126 (98,161) | 129.65 (101.57,165.66) | -1.85 (-2.15,-1.56) | -2.16 (-2.4,-1.92) |
| Bahamas | 0 (0,0) | 2.05 (1.42,2.76) | 1 (1,1) | 50.9 (36.16,67.28) | 0 (0,0) | 2.26 (1.5,3.07) | 2 (1,3) | 53.66 (36.49,70.84) | 0.15 (0.04,0.27) | 0.07 (-0.03,0.17) |
| Bahrain | 0 (0,0) | 24.29 (18.07,30.89) | 7 (5,8) | 470.71 (358.98,588.03) | 1 (0,1) | 11.93 (8.51,15.76) | 16 (12,21) | 232.64 (174.26,301.1) | -2.84 (-3.28,-2.41) | -2.84 (-3.17,-2.5) |

**Continued Table S1.** The global burden of COPD attributable to smoking for 204 countries or territories in 1990 and 2021 and the temporal trends during 1990–2021

| **location** | **1990** | | | | **2021** | | | | **EAPC** | |
| --- | --- | --- | --- | --- | --- | --- | --- | --- | --- | --- |
| **Death cases**  **No.×102 (95% *UI*)** | **ASMR per 105**  **No. (95% *UI*)** | **DALYs**  **No.×102 (95% *UI*)** | **ASDR per 105**  **No. (95% *UI*)** | **Death cases**  **No.×102 (95% *UI*)** | **ASMR per 105**  **No. (95% *UI*)** | **DALYs**  **No.×102 (95% *UI*)** | **ASDR per 105**  **No. (95% *UI*)** | **ASMR**  **No. (95% *CI*)** | **ASDR**  **No. (95% *CI*)** |
| Bangladesh | 190 (140,237) | 46.58 (34.19,58.36) | 4407 (3339,5529) | 1003.12 (761.8,1256.52) | 272 (198,359) | 22.76 (16.59,29.64) | 5980 (4492,7718) | 459.17 (345.72,589.03) | -2.58 (-2.95,-2.21) | -2.64 (-2.89,-2.39) |
| Barbados | 0 (0,0) | 1.74 (1.27,2.28) | 1 (1,1) | 37.13 (27.42,47.73) | 0 (0,0) | 1.61 (1.06,2.26) | 2 (1,2) | 33.13 (22.93,45.27) | -0.77 (-1.17,-0.37) | -0.75 (-1.06,-0.45) |
| Belarus | 25 (21,29) | 19.4 (16.33,22.56) | 572 (483,659) | 436.41 (368.7,502.19) | 6 (5,8) | 3.94 (3.03,4.95) | 177 (139,217) | 110.64 (87.04,135.68) | -6.37 (-7.06,-5.68) | -5.65 (-6.28,-5.02) |
| Belgium | 29 (23,34) | 17.76 (14.2,21.22) | 587 (480,689) | 373.39 (305.76,437.12) | 21 (16,27) | 8.18 (6.2,10.31) | 453 (350,561) | 195.32 (153.1,240.02) | -2.75 (-2.93,-2.57) | -2.29 (-2.42,-2.16) |
| Belize | 0 (0,0) | 3.91 (2.95,4.98) | 1 (1,1) | 87.14 (68.27,107.67) | 0 (0,0) | 5.63 (4.12,7.32) | 3 (3,4) | 119.43 (89.06,151.42) | 0.87 (0.23,1.51) | 0.76 (0.19,1.33) |
| Benin | 1 (1,1) | 5.71 (3.84,7.98) | 27 (18,37) | 136.8 (95.03,189.49) | 1 (1,1) | 2.2 (1.44,3.05) | 30 (21,41) | 59.62 (41.28,80.47) | -3.09 (-3.15,-3.04) | -2.73 (-2.77,-2.68) |
| Bermuda | 0 (0,0) | 3.05 (2.2,4.04) | 0 (0,1) | 69.23 (50.48,90.28) | 0 (0,0) | 2.17 (1.48,2.99) | 1 (1,1) | 53.06 (37.71,70.08) | -1.25 (-1.46,-1.04) | -1.01 (-1.16,-0.86) |
| Bhutan | 0 (0,1) | 26.46 (14.88,41.15) | 11 (7,17) | 538.92 (317.48,823.57) | 1 (1,1) | 18.51 (12.1,26.43) | 19 (13,27) | 341.11 (224.56,487.04) | -1.26 (-1.36,-1.15) | -1.6 (-1.72,-1.48) |
| Bolivia (Plurinational State of) | 2 (1,2) | 6.84 (4.74,9.3) | 39 (28,52) | 135.24 (96.49,179.3) | 3 (2,5) | 4.27 (2.8,6.15) | 67 (47,94) | 81.57 (55.99,114.32) | -0.99 (-1.18,-0.79) | -1.19 (-1.39,-0.99) |
| Bosnia and Herzegovina | 5 (4,6) | 14.64 (11.5,18.12) | 130 (104,158) | 333.61 (265.08,406.46) | 5 (4,7) | 8.15 (5.88,10.52) | 129 (97,164) | 204.37 (154.68,259.58) | -2.16 (-2.3,-2.02) | -1.78 (-1.89,-1.67) |
| Botswana | 1 (1,1) | 23.99 (16.74,32.11) | 27 (19,36) | 515.65 (369.71,688.58) | 1 (1,2) | 11.78 (8.32,15.59) | 37 (27,47) | 274.94 (202.28,350.76) | -2.49 (-2.64,-2.33) | -2.27 (-2.44,-2.11) |
| Brazil | 165 (135,196) | 22.56 (18.19,27.22) | 3795 (3128,4401) | 456.02 (373.43,533) | 197 (148,252) | 8.13 (6.09,10.41) | 4413 (3362,5539) | 176.65 (134.09,221.94) | -3.85 (-4.15,-3.55) | -3.65 (-3.94,-3.37) |
| Brunei Darussalam | 0 (0,0) | 28.14 (20.71,37.17) | 5 (4,6) | 531.59 (400.97,672.12) | 0 (0,0) | 10.52 (7.32,13.83) | 6 (4,7) | 201.82 (145.71,256.91) | -2.69 (-2.96,-2.42) | -2.89 (-3.08,-2.7) |
| Bulgaria | 13 (11,16) | 11.23 (8.94,13.95) | 371 (301,444) | 294.47 (240.11,354.67) | 7 (6,10) | 5.11 (3.84,6.55) | 216 (165,268) | 160.45 (125.13,198.38) | -2.62 (-2.77,-2.47) | -2.04 (-2.16,-1.92) |

**Continued Table S1.** The global burden of COPD attributable to smoking for 204 countries or territories in 1990 and 2021 and the temporal trends during 1990–2021

| **location** | **1990** | | | | **2021** | | | | **EAPC** | |
| --- | --- | --- | --- | --- | --- | --- | --- | --- | --- | --- |
| **Death cases**  **No.×102 (95% *UI*)** | **ASMR per 105**  **No. (95% *UI*)** | **DALYs**  **No.×102 (95% *UI*)** | **ASDR per 105**  **No. (95% *UI*)** | **Death cases**  **No.×102 (95% *UI*)** | **ASMR per 105**  **No. (95% *UI*)** | **DALYs**  **No.×102 (95% *UI*)** | **ASDR per 105**  **No. (95% *UI*)** | **ASMR**  **No. (95% *CI*)** | **ASDR**  **No. (95% *CI*)** |
| Burkina Faso | 1 (0,1) | 1.9 (1.26,2.64) | 23 (16,32) | 53.19 (37.01,71.94) | 1 (1,2) | 1.37 (0.93,1.9) | 39 (29,53) | 40.95 (29.68,55.16) | -1.03 (-1.15,-0.92) | -0.89 (-1.01,-0.77) |
| Burundi | 3 (2,4) | 13.12 (8.82,18.49) | 65 (43,90) | 291.6 (194.85,406.65) | 2 (1,3) | 5.25 (3.27,7.65) | 59 (39,83) | 126.56 (84.48,176.67) | -3.2 (-3.65,-2.75) | -2.91 (-3.35,-2.47) |
| Cabo Verde | 0 (0,0) | 5.46 (3.64,7.56) | 3 (2,4) | 126.89 (87.24,170.86) | 0 (0,0) | 1.7 (1.09,2.46) | 2 (1,3) | 45.51 (30.62,63.5) | -3.96 (-4.9,-3) | -3.36 (-4.11,-2.61) |
| Cambodia | 9 (7,11) | 26.06 (20.04,32.82) | 212 (165,262) | 534.59 (421.4,660.64) | 19 (14,24) | 20.83 (15.72,25.83) | 448 (339,557) | 411.14 (315.02,499.88) | -0.82 (-0.88,-0.76) | -0.99 (-1.05,-0.92) |
| Cameroon | 2 (1,3) | 5.16 (3.5,7.35) | 56 (40,76) | 126.43 (89.14,173.69) | 3 (2,4) | 2.65 (1.73,3.77) | 96 (67,127) | 72.75 (50.54,98.51) | -1.96 (-2.09,-1.84) | -1.67 (-1.78,-1.56) |
| Canada | 43 (34,51) | 12.9 (10.37,15.4) | 921 (744,1096) | 277.18 (223.86,329.33) | 53 (39,68) | 6.56 (4.93,8.37) | 1122 (847,1415) | 148.72 (112.85,186.93) | -2.42 (-2.57,-2.26) | -2.21 (-2.33,-2.08) |
| Central African Republic | 1 (1,2) | 10.91 (6.6,16) | 31 (19,45) | 266.85 (165.09,386.75) | 1 (1,2) | 6.96 (4.24,10.37) | 40 (25,57) | 177.14 (112.04,256) | -1.53 (-1.69,-1.36) | -1.43 (-1.59,-1.26) |
| Chad | 2 (1,2) | 6.42 (4.05,9.51) | 40 (27,58) | 147.1 (97.45,210.65) | 2 (1,3) | 4.72 (2.88,7.01) | 63 (40,90) | 114.28 (74.17,164.14) | -1.07 (-1.15,-1) | -0.9 (-0.98,-0.82) |
| Chile | 6 (4,7) | 5.8 (4.36,7.44) | 143 (112,175) | 141.62 (110.41,175.16) | 6 (4,8) | 2.33 (1.68,3.09) | 143 (107,181) | 55.67 (42.01,70.08) | -2.5 (-2.87,-2.12) | -2.68 (-2.96,-2.41) |
| China | 5387 (4398,6465) | 96.37 (77.06,115.04) | 112435 (92111,134559) | 1627.97 (1325.04,1940.55) | 5632 (4154,7153) | 31.17 (23.05,39.35) | 101874 (77472,126914) | 515.69 (392.02,643.38) | -4.12 (-4.31,-3.92) | -4.14 (-4.3,-3.98) |
| Colombia | 15 (12,19) | 9.92 (7.66,12.52) | 368 (291,454) | 219.22 (171.99,270.98) | 25 (17,35) | 4.4 (3.04,6.17) | 498 (356,677) | 89.43 (64,121.47) | -3.39 (-3.72,-3.06) | -3.64 (-3.97,-3.31) |
| Comoros | 0 (0,0) | 12.65 (8.15,17.78) | 5 (3,6) | 263.07 (174.97,365.04) | 0 (0,0) | 6.68 (4.23,9.5) | 6 (4,9) | 140.73 (94.37,193.41) | -2.37 (-2.58,-2.16) | -2.34 (-2.56,-2.12) |
| Congo | 1 (1,1) | 8.89 (5.56,13.22) | 21 (14,32) | 205.07 (130.89,303.09) | 1 (1,2) | 5.9 (3.81,8.07) | 35 (24,47) | 137.39 (91.89,183.6) | -1.33 (-1.48,-1.18) | -1.33 (-1.49,-1.16) |

**Continued Table S1.** The global burden of COPD attributable to smoking for 204 countries or territories in 1990 and 2021 and the temporal trends during 1990–2021

| **location** | **1990** | | | | **2021** | | | | **EAPC** | |
| --- | --- | --- | --- | --- | --- | --- | --- | --- | --- | --- |
| **Death cases**  **No.×102 (95% *UI*)** | **ASMR per 105**  **No. (95% *UI*)** | **DALYs**  **No.×102 (95% *UI*)** | **ASDR per 105**  **No. (95% *UI*)** | **Death cases**  **No.×102 (95% *UI*)** | **ASMR per 105**  **No. (95% *UI*)** | **DALYs**  **No.×102 (95% *UI*)** | **ASDR per 105**  **No. (95% *UI*)** | **ASMR**  **No. (95% *CI*)** | **ASDR**  **No. (95% *CI*)** |
| Cook Islands | 0 (0,0) | 14.78 (10.39,19.97) | 0 (0,1) | 325.49 (239.46,424.31) | 0 (0,0) | 5.68 (3.99,7.96) | 0 (0,0) | 137.92 (100.24,182.5) | -3.46 (-3.69,-3.24) | -3.09 (-3.27,-2.9) |
| Costa Rica | 1 (1,2) | 8.69 (6.63,10.99) | 28 (22,35) | 168.33 (130.59,208.45) | 3 (2,3) | 4.66 (3.3,6.26) | 51 (36,66) | 91.8 (66.22,119.69) | -2.42 (-3.08,-1.76) | -2.44 (-2.98,-1.89) |
| Côte d'Ivoire | 2 (1,3) | 7.48 (5.06,10.45) | 65 (46,88) | 170.15 (118.82,228.6) | 4 (2,5) | 4.21 (2.93,5.66) | 119 (83,154) | 106.61 (74.38,139.13) | -2.01 (-2.13,-1.89) | -1.69 (-1.81,-1.56) |
| Croatia | 6 (5,7) | 10.47 (8.45,12.55) | 146 (118,171) | 244.94 (197.72,288.92) | 9 (7,12) | 9.09 (6.93,11.36) | 187 (145,228) | 199.08 (156.44,241.77) | -0.13 (-0.29,0.03) | -0.36 (-0.49,-0.24) |
| Cuba | 7 (5,8) | 6.71 (5.22,8.21) | 160 (129,191) | 157.39 (126.53,188.32) | 16 (12,20) | 7.99 (5.97,9.91) | 369 (285,457) | 186.96 (144.03,231.29) | 0.42 (0.15,0.69) | 0.37 (0.1,0.65) |
| Cyprus | 1 (1,2) | 24.1 (16.55,32.55) | 26 (19,34) | 390.98 (284.89,511.98) | 2 (1,2) | 8.66 (6.19,11.59) | 35 (27,45) | 170.19 (131.38,218.35) | -3.44 (-3.63,-3.25) | -2.77 (-2.9,-2.64) |
| Czechia | 13 (10,16) | 9.51 (7.44,11.74) | 342 (271,414) | 247.79 (197.49,298.9) | 15 (12,20) | 6.69 (5.02,8.44) | 387 (299,481) | 179.12 (139.67,221.33) | 0.38 (-0.23,0.98) | 0.11 (-0.33,0.56) |
| Democratic People's Republic of Korea | 55 (40,72) | 46.73 (33.69,60.96) | 1263 (942,1625) | 891.57 (658,1144.63) | 90 (66,120) | 30.09 (21.88,40.26) | 1988 (1470,2568) | 619.31 (457.97,802.32) | -1.49 (-1.55,-1.43) | -1.23 (-1.3,-1.15) |
| Democratic Republic of the Congo | 7 (5,11) | 5.88 (3.8,8.33) | 213 (141,303) | 139.44 (91.34,196.45) | 13 (8,19) | 4.08 (2.45,6.13) | 393 (251,573) | 105.32 (66.59,154.33) | -1.11 (-1.31,-0.91) | -0.83 (-1,-0.65) |
| Denmark | 19 (16,22) | 22.46 (18.99,25.67) | 420 (357,478) | 514.36 (438.56,583.87) | 22 (17,27) | 16.3 (12.47,20.23) | 408 (321,496) | 324.61 (257.48,394.47) | -1.52 (-1.83,-1.2) | -1.98 (-2.26,-1.71) |
| Djibouti | 0 (0,0) | 11.47 (7.69,16.11) | 3 (2,4) | 244.24 (168.67,341.81) | 0 (0,1) | 7.6 (4.52,11.99) | 10 (6,14) | 171.78 (108.57,253.46) | -1.32 (-1.42,-1.21) | -1.14 (-1.23,-1.05) |
| Dominica | 0 (0,0) | 3.85 (2.77,5.1) | 0 (0,1) | 82.43 (60.7,106.53) | 0 (0,0) | 3.35 (2.33,4.59) | 1 (0,1) | 75.72 (54.8,101.33) | -0.48 (-0.58,-0.38) | -0.23 (-0.35,-0.1) |
| Dominican Republic | 2 (1,3) | 6.96 (5.16,8.95) | 41 (32,53) | 128.25 (97.84,164.93) | 5 (3,8) | 5.34 (3.51,8.22) | 110 (78,160) | 112.94 (80.31,164.71) | -0.36 (-0.72,0) | -0.1 (-0.35,0.16) |
| Ecuador | 3 (2,4) | 6.91 (5.21,8.99) | 58 (45,72) | 121.04 (93.23,152.7) | 4 (3,6) | 2.93 (2.01,3.97) | 80 (57,105) | 52 (37.19,68.86) | -1.98 (-2.28,-1.67) | -2.16 (-2.41,-1.92) |

**Continued Table S1.** The global burden of COPD attributable to smoking for 204 countries or territories in 1990 and 2021 and the temporal trends during 1990–2021

| **location** | **1990** | | | | **2021** | | | | **EAPC** | |
| --- | --- | --- | --- | --- | --- | --- | --- | --- | --- | --- |
| **Death cases**  **No.×102 (95% *UI*)** | **ASMR per 105**  **No. (95% *UI*)** | **DALYs**  **No.×102 (95% *UI*)** | **ASDR per 105**  **No. (95% *UI*)** | **Death cases**  **No.×102 (95% *UI*)** | **ASMR per 105**  **No. (95% *UI*)** | **DALYs**  **No.×102 (95% *UI*)** | **ASDR per 105**  **No. (95% *UI*)** | **ASMR**  **No. (95% *CI*)** | **ASDR**  **No. (95% *CI*)** |
| Egypt | 34 (26,41) | 16.76 (12.91,20.85) | 908 (710,1106) | 361.9 (283.55,441.9) | 42 (31,54) | 9.92 (7.41,12.79) | 1248 (963,1556) | 225.28 (175.35,277.84) | -1.81 (-1.96,-1.67) | -1.72 (-1.87,-1.56) |
| El Salvador | 1 (1,1) | 3 (2.04,4.19) | 20 (14,26) | 67.78 (47.48,91.43) | 1 (1,2) | 2.2 (1.46,3.12) | 33 (23,46) | 53.34 (36.46,73.34) | -1.03 (-1.2,-0.87) | -0.82 (-0.97,-0.67) |
| Equatorial Guinea | 0 (0,0) | 8.36 (5.15,12.71) | 4 (2,6) | 203.6 (130.05,307.48) | 0 (0,0) | 3.51 (2.14,5.31) | 4 (3,6) | 88.53 (58.3,128.36) | -3.09 (-3.54,-2.63) | -2.98 (-3.46,-2.51) |
| Eritrea | 1 (0,1) | 6.66 (4.33,10.15) | 21 (13,31) | 169.85 (112.16,254.63) | 1 (1,1) | 3.59 (2.32,5.29) | 27 (18,39) | 91.21 (60.86,132.02) | -2.25 (-2.43,-2.07) | -2.28 (-2.45,-2.11) |
| Estonia | 1 (1,1) | 3.95 (3.17,4.83) | 23 (19,28) | 110.77 (90.93,134.71) | 1 (0,1) | 2.27 (1.71,2.86) | 17 (13,21) | 65.82 (51.66,81.1) | -1.77 (-2.09,-1.46) | -1.64 (-1.9,-1.38) |
| Eswatini | 0 (0,0) | 15.85 (10.24,22.34) | 9 (6,12) | 335.39 (223.84,461.07) | 0 (0,1) | 8.99 (5.73,12.73) | 11 (7,15) | 206.07 (137.19,281.89) | -1.44 (-1.84,-1.05) | -1.31 (-1.72,-0.89) |
| Ethiopia | 9 (6,13) | 4.99 (3.4,6.96) | 254 (177,352) | 125.74 (88.23,172.5) | 8 (5,11) | 2.18 (1.4,3.09) | 222 (152,308) | 53.84 (37.16,74.74) | -2.57 (-2.88,-2.26) | -2.7 (-3.02,-2.39) |
| Fiji | 0 (0,1) | 18.02 (12.8,23.38) | 13 (10,17) | 399.36 (295.18,506.25) | 1 (0,1) | 8.04 (5.78,11.1) | 14 (10,18) | 182.6 (133.97,247.46) | -3.23 (-3.54,-2.93) | -3.03 (-3.26,-2.8) |
| Finland | 4 (3,5) | 4.95 (3.75,6.17) | 97 (76,119) | 136.18 (106.73,166.33) | 4 (3,5) | 2.77 (2.01,3.58) | 100 (74,128) | 80.5 (60.16,101.68) | -1.88 (-2.08,-1.68) | -1.73 (-1.88,-1.58) |
| France | 69 (54,85) | 7.67 (5.98,9.38) | 1318 (1039,1578) | 153.74 (122.02,183.48) | 49 (35,64) | 2.86 (2.12,3.68) | 1053 (802,1309) | 74.87 (58.26,91.58) | -3.58 (-3.98,-3.19) | -2.53 (-2.85,-2.2) |
| Gabon | 0 (0,0) | 5.84 (3.83,8.17) | 8 (5,11) | 137.94 (91.35,186.53) | 0 (0,1) | 3.68 (2.3,5.59) | 10 (6,14) | 93.88 (60.91,137.02) | -1.52 (-1.57,-1.47) | -1.23 (-1.28,-1.18) |
| Gambia | 0 (0,0) | 8.36 (5.74,11.39) | 7 (5,9) | 203.95 (144.88,273.78) | 0 (0,1) | 4.61 (2.9,6.5) | 11 (8,16) | 117.62 (79.32,162.52) | -1.88 (-2.14,-1.61) | -1.78 (-2.02,-1.54) |
| Georgia | 2 (2,3) | 3.3 (2.55,4.2) | 55 (43,68) | 87.69 (69.22,108.3) | 3 (2,3) | 4.61 (3.68,5.54) | 71 (58,86) | 120.37 (98.75,144.11) | 3.92 (3.09,4.76) | 3.08 (2.45,3.72) |
| Germany | 140 (112,166) | 10.36 (8.3,12.28) | 3122 (2517,3706) | 242.27 (195.94,286.83) | 148 (113,184) | 7.05 (5.47,8.68) | 3381 (2633,4158) | 180.82 (143.19,220.05) | -0.96 (-1.29,-0.63) | -0.7 (-0.95,-0.44) |

**Continued Table S1.** The global burden of COPD attributable to smoking for 204 countries or territories in 1990 and 2021 and the temporal trends during 1990–2021

| **location** | **1990** | | | | **2021** | | | | **EAPC** | |
| --- | --- | --- | --- | --- | --- | --- | --- | --- | --- | --- |
| **Death cases**  **No.×102 (95% *UI*)** | **ASMR per 105**  **No. (95% *UI*)** | **DALYs**  **No.×102 (95% *UI*)** | **ASDR per 105**  **No. (95% *UI*)** | **Death cases**  **No.×102 (95% *UI*)** | **ASMR per 105**  **No. (95% *UI*)** | **DALYs**  **No.×102 (95% *UI*)** | **ASDR per 105**  **No. (95% *UI*)** | **ASMR**  **No. (95% *CI*)** | **ASDR**  **No. (95% *CI*)** |
| Ghana | 1 (1,1) | 1.95 (1.32,2.65) | 26 (18,35) | 47.46 (32.87,62.93) | 2 (2,3) | 1.89 (1.25,2.68) | 76 (54,104) | 49.02 (34.64,66.34) | 0.76 (0.36,1.16) | 0.88 (0.53,1.23) |
| Greece | 10 (8,12) | 6.73 (5.53,8.08) | 266 (219,314) | 177.4 (146.11,209.15) | 21 (16,27) | 6.72 (5.24,8.47) | 462 (361,576) | 181.72 (143.91,222.1) | 0.72 (-0.04,1.49) | 0.66 (0.15,1.18) |
| Greenland | 0 (0,0) | 43.46 (32.31,54) | 3 (2,3) | 944.09 (727.87,1144.49) | 0 (0,0) | 18.84 (13.87,25.49) | 3 (2,4) | 431.87 (325.8,555.24) | -2.63 (-2.73,-2.53) | -2.48 (-2.56,-2.4) |
| Grenada | 0 (0,0) | 2.4 (1.73,3.23) | 0 (0,1) | 59.6 (43.7,76.81) | 0 (0,0) | 2.47 (1.78,3.32) | 1 (1,1) | 60.68 (44.66,78.66) | -0.54 (-1.28,0.2) | -0.4 (-0.92,0.12) |
| Guam | 0 (0,0) | 8.93 (6.53,11.77) | 2 (1,2) | 213.55 (160.9,270.97) | 0 (0,0) | 3.5 (2.54,4.53) | 2 (2,3) | 110.12 (80.91,140.54) | -2.86 (-3.12,-2.6) | -2.06 (-2.26,-1.87) |
| Guatemala | 1 (1,2) | 5.59 (4.03,7.55) | 29 (22,38) | 102.5 (76.29,134.7) | 3 (2,3) | 2.72 (1.87,3.71) | 56 (39,73) | 54.26 (38.19,72.02) | -2.41 (-2.66,-2.17) | -2.25 (-2.5,-1.99) |
| Guinea | 2 (1,3) | 5.95 (3.48,8.93) | 43 (26,62) | 133.81 (83.04,195.47) | 2 (1,3) | 4.43 (2.87,6.37) | 60 (41,84) | 110.13 (74.4,153.88) | -0.61 (-0.79,-0.43) | -0.3 (-0.46,-0.14) |
| Guinea-Bissau | 0 (0,0) | 4.45 (2.9,6.49) | 5 (3,7) | 112.59 (74.8,162.07) | 0 (0,0) | 3.4 (2.18,4.8) | 7 (5,10) | 92.31 (60.7,127.91) | -0.15 (-0.64,0.35) | 0.06 (-0.42,0.53) |
| Guyana | 0 (0,0) | 2.68 (1.97,3.52) | 2 (2,3) | 62.26 (46.48,81.06) | 0 (0,0) | 2.98 (2,4.23) | 5 (3,7) | 74.23 (50.69,103.52) | 0.4 (0.13,0.67) | 0.66 (0.43,0.89) |
| Haiti | 2 (1,2) | 5.69 (2.72,8.78) | 43 (22,64) | 133.48 (67.64,199.33) | 2 (1,4) | 3.82 (1.84,6.01) | 58 (29,91) | 84.54 (43.06,131.38) | -1.21 (-1.26,-1.16) | -1.42 (-1.5,-1.35) |
| Honduras | 2 (1,3) | 11.68 (8.4,15.26) | 45 (33,58) | 235.93 (173.03,301.29) | 7 (4,9) | 13.11 (8.34,18.35) | 146 (100,197) | 251.85 (171.37,340.69) | 0.81 (0.61,1.02) | 0.57 (0.39,0.75) |
| Hungary | 21 (16,25) | 14.16 (11.09,16.93) | 533 (430,627) | 365.08 (295.17,428.25) | 22 (16,27) | 11.14 (8.44,13.99) | 576 (444,712) | 318.33 (247.55,392.25) | -0.38 (-0.78,0.03) | -0.13 (-0.45,0.2) |
| Iceland | 0 (0,0) | 9.43 (7.27,11.49) | 7 (6,8) | 242.72 (193.72,288.71) | 0 (0,0) | 5.41 (3.83,7.43) | 8 (6,11) | 139.83 (103.9,180.83) | -1.84 (-2.03,-1.65) | -1.91 (-2.1,-1.72) |
| India | 1500 (1076,1894) | 43.69 (31.48,55.74) | 36568 (26840,45534) | 897.55 (659.67,1126.29) | 3091 (2385,3880) | 31.03 (23.87,38.92) | 66816 (51993,83099) | 604.96 (471.22,750.44) | -0.85 (-1.04,-0.66) | -1.13 (-1.25,-1.01) |

**Continued Table S1.** The global burden of COPD attributable to smoking for 204 countries or territories in 1990 and 2021 and the temporal trends during 1990–2021

| **location** | **1990** | | | | **2021** | | | | **EAPC** | |
| --- | --- | --- | --- | --- | --- | --- | --- | --- | --- | --- |
| **Death cases**  **No.×102 (95% *UI*)** | **ASMR per 105**  **No. (95% *UI*)** | **DALYs**  **No.×102 (95% *UI*)** | **ASDR per 105**  **No. (95% *UI*)** | **Death cases**  **No.×102 (95% *UI*)** | **ASMR per 105**  **No. (95% *UI*)** | **DALYs**  **No.×102 (95% *UI*)** | **ASDR per 105**  **No. (95% *UI*)** | **ASMR**  **No. (95% *CI*)** | **ASDR**  **No. (95% *CI*)** |
| Indonesia | 150 (107,189) | 20.45 (14.73,26.26) | 3709 (2719,4588) | 423.33 (312.09,527.35) | 354 (266,442) | 20.3 (15.31,25.09) | 8761 (6685,10898) | 409.83 (314.63,502.73) | 0.06 (-0.16,0.27) | -0.01 (-0.18,0.15) |
| Iran (Islamic Republic of) | 12 (9,16) | 5.7 (4.1,7.54) | 351 (263,450) | 137.21 (102.46,176.72) | 31 (24,40) | 4.62 (3.44,5.91) | 871 (669,1075) | 114.03 (86.85,141.78) | -0.19 (-0.35,-0.03) | -0.21 (-0.34,-0.08) |
| Iraq | 4 (3,6) | 6.18 (4.49,8.09) | 123 (93,156) | 160.06 (120.91,202.94) | 9 (6,12) | 5.17 (3.54,6.75) | 284 (208,357) | 131.46 (95.45,165.11) | -1.19 (-1.42,-0.96) | -1.05 (-1.19,-0.91) |
| Ireland | 12 (10,14) | 29.86 (24.23,34.95) | 239 (197,278) | 568.43 (465.83,660.52) | 7 (5,10) | 8.55 (6.12,11.11) | 141 (106,178) | 171.28 (129.86,215.96) | -4.24 (-4.52,-3.97) | -4.08 (-4.31,-3.85) |
| Israel | 4 (3,5) | 9.4 (7.19,11.95) | 98 (78,119) | 202.9 (160.63,247.84) | 5 (4,7) | 3.93 (2.89,5.12) | 128 (96,161) | 102.98 (77.53,129.2) | -2.58 (-2.81,-2.36) | -2.02 (-2.19,-1.86) |
| Italy | 95 (76,113) | 10.39 (8.25,12.35) | 1964 (1599,2301) | 215.96 (176.05,252.99) | 81 (58,105) | 4.32 (3.19,5.5) | 1531 (1162,1935) | 97.51 (74.94,121.82) | -2.78 (-2.94,-2.62) | -2.49 (-2.63,-2.35) |
| Jamaica | 1 (1,1) | 4.2 (3.23,5.29) | 18 (14,23) | 101.04 (79.9,125.65) | 1 (1,2) | 4.38 (2.95,6.14) | 31 (22,43) | 102.23 (71.17,139.2) | -0.28 (-0.96,0.39) | -0.4 (-1.02,0.22) |
| Japan | 94 (79,109) | 5.93 (4.95,6.97) | 2256 (1864,2652) | 135.66 (112.02,160.15) | 116 (87,149) | 2.21 (1.68,2.76) | 2462 (1871,3122) | 59.75 (46.72,74.63) | -3.39 (-3.67,-3.12) | -2.69 (-2.81,-2.57) |
| Jordan | 1 (1,1) | 10.87 (8.13,14.37) | 30 (24,38) | 250.6 (192.61,316.34) | 3 (2,4) | 5.31 (3.96,6.81) | 99 (79,122) | 143.81 (112.97,177.18) | -2.76 (-2.98,-2.53) | -2.15 (-2.32,-1.98) |
| Kazakhstan | 18 (14,21) | 14.64 (11.45,17.93) | 467 (374,560) | 361.59 (288.07,436.01) | 24 (19,30) | 14.27 (10.92,17.97) | 635 (495,785) | 343.98 (269.3,425.35) | -0.54 (-1.09,0.02) | -0.73 (-1.26,-0.2) |
| Kenya | 5 (3,8) | 8.2 (4.91,12.15) | 124 (80,175) | 168.58 (107.95,239.24) | 10 (6,15) | 5.8 (3.36,8.77) | 272 (171,390) | 128.62 (79.36,186.56) | -1.32 (-1.48,-1.15) | -1.02 (-1.2,-0.85) |
| Kiribati | 0 (0,0) | 44.91 (30.14,77.01) | 3 (2,5) | 978.21 (671.01,1572.59) | 0 (0,0) | 34.86 (24.96,62.55) | 5 (4,8) | 741.91 (549.1,1246.66) | -1.02 (-1.17,-0.86) | -1.06 (-1.19,-0.92) |
| Kuwait | 0 (0,0) | 2.38 (1.79,2.98) | 5 (4,6) | 79.51 (61.27,97.46) | 0 (0,0) | 1.09 (0.79,1.47) | 16 (12,20) | 54.3 (41.45,69.75) | -2.3 (-2.9,-1.7) | -1.16 (-1.43,-0.89) |
| Kyrgyzstan | 9 (7,10) | 31.72 (26.18,37.18) | 209 (174,244) | 706.22 (586.12,822.58) | 4 (3,5) | 10.68 (8.47,13.22) | 111 (88,138) | 238.43 (191.58,294.25) | -3.9 (-4.45,-3.35) | -4.17 (-4.75,-3.58) |

**Continued Table S1.** The global burden of COPD attributable to smoking for 204 countries or territories in 1990 and 2021 and the temporal trends during 1990–2021

| **location** | **1990** | | | | **2021** | | | | **EAPC** | |
| --- | --- | --- | --- | --- | --- | --- | --- | --- | --- | --- |
| **Death cases**  **No.×102 (95% *UI*)** | **ASMR per 105**  **No. (95% *UI*)** | **DALYs**  **No.×102 (95% *UI*)** | **ASDR per 105**  **No. (95% *UI*)** | **Death cases**  **No.×102 (95% *UI*)** | **ASMR per 105**  **No. (95% *UI*)** | **DALYs**  **No.×102 (95% *UI*)** | **ASDR per 105**  **No. (95% *UI*)** | **ASMR**  **No. (95% *CI*)** | **ASDR**  **No. (95% *CI*)** |
| Lao People's Democratic Republic | 7 (4,9) | 39.64 (26.17,51.48) | 162 (110,212) | 841.17 (577.94,1092.93) | 9 (7,12) | 26.38 (19.27,34.15) | 214 (155,275) | 527.58 (381.93,670.65) | -1.48 (-1.56,-1.41) | -1.66 (-1.72,-1.59) |
| Latvia | 2 (2,2) | 5.24 (4.14,6.31) | 49 (41,59) | 137.02 (112.57,162.74) | 1 (1,2) | 2.98 (2.24,3.77) | 32 (25,40) | 87.94 (69.26,108.72) | -1.61 (-2,-1.22) | -1.32 (-1.65,-0.98) |
| Lebanon | 3 (2,4) | 14.72 (9.88,21.02) | 69 (50,93) | 334.35 (240.28,451.85) | 7 (5,8) | 9.88 (7.36,12.73) | 150 (117,187) | 241.99 (188.7,300.55) | -0.9 (-1.11,-0.69) | -0.69 (-0.86,-0.52) |
| Lesotho | 2 (1,2) | 22.44 (14.42,31.62) | 37 (25,52) | 469.3 (313.92,642.32) | 2 (2,3) | 25.83 (17.2,34.59) | 61 (43,81) | 588.94 (411.51,779.81) | 1.12 (0.86,1.39) | 1.32 (1.06,1.59) |
| Liberia | 0 (0,1) | 4.19 (2.74,5.82) | 11 (8,16) | 100.42 (68.86,138.57) | 0 (0,1) | 2.34 (1.48,3.4) | 15 (10,20) | 65.25 (43.95,89.88) | -1.92 (-2.06,-1.78) | -1.41 (-1.54,-1.28) |
| Libya | 1 (1,2) | 7.31 (4.84,10.12) | 31 (23,41) | 170.19 (124.26,223.11) | 3 (2,4) | 7.41 (4.81,10.15) | 90 (65,119) | 176.66 (123.71,232.56) | 0.65 (0.41,0.88) | 0.51 (0.35,0.68) |
| Lithuania | 5 (4,6) | 11.73 (9.41,13.99) | 122 (100,143) | 269.14 (220.44,314.33) | 2 (2,3) | 3.55 (2.78,4.35) | 52 (42,64) | 95.95 (76.68,116.32) | -3.91 (-4.16,-3.67) | -3.43 (-3.66,-3.2) |
| Luxembourg | 1 (1,1) | 11.75 (9.1,14.65) | 15 (12,18) | 267.92 (211.84,326.4) | 1 (1,1) | 6.4 (4.68,8.39) | 16 (12,21) | 152.53 (114.92,194.56) | -1.99 (-2.1,-1.88) | -1.92 (-2.02,-1.82) |
| Madagascar | 5 (3,7) | 13.69 (9.43,18.67) | 114 (80,152) | 259.21 (180.92,345.54) | 5 (3,7) | 6.96 (4.22,10.11) | 124 (82,177) | 134.9 (86.48,192.2) | -2.38 (-2.55,-2.2) | -2.29 (-2.46,-2.12) |
| Malawi | 3 (2,4) | 9.58 (6.79,12.68) | 67 (50,86) | 198.02 (143.77,255.7) | 4 (3,6) | 7.6 (5.47,10.11) | 121 (88,161) | 174.88 (128.8,230.25) | -0.95 (-1.15,-0.75) | -0.66 (-0.88,-0.43) |
| Malaysia | 15 (12,19) | 19.6 (15.43,24.18) | 335 (268,408) | 397.78 (318.94,484.24) | 26 (20,32) | 11.2 (8.42,13.86) | 601 (477,738) | 228.26 (178.41,277.36) | -2.6 (-2.98,-2.21) | -2.44 (-2.73,-2.14) |
| Maldives | 0 (0,0) | 43.5 (29.92,57.53) | 6 (4,7) | 808.21 (583.49,1036.43) | 0 (0,0) | 14.59 (11.05,18.69) | 8 (6,10) | 277.04 (216.6,345.98) | -3.86 (-3.98,-3.75) | -3.88 (-4.06,-3.7) |
| Mali | 2 (1,3) | 7.14 (4.86,9.77) | 56 (40,75) | 152.86 (107.08,204.24) | 5 (3,7) | 7.94 (5.21,11.07) | 139 (99,186) | 172.15 (120.12,231.13) | 0.78 (0.63,0.93) | 0.76 (0.62,0.91) |
| Malta | 0 (0,0) | 9.49 (7.36,11.66) | 9 (7,11) | 215.71 (172.15,258.16) | 0 (0,0) | 3.05 (2.21,3.98) | 8 (6,11) | 87.38 (65.7,110.4) | -3.87 (-4.12,-3.62) | -3.09 (-3.27,-2.9) |

**Continued Table S1.** The global burden of COPD attributable to smoking for 204 countries or territories in 1990 and 2021 and the temporal trends during 1990–2021

| **location** | **1990** | | | | **2021** | | | | **EAPC** | |
| --- | --- | --- | --- | --- | --- | --- | --- | --- | --- | --- |
| **Death cases**  **No.×102 (95% *UI*)** | **ASMR per 105**  **No. (95% *UI*)** | **DALYs**  **No.×102 (95% *UI*)** | **ASDR per 105**  **No. (95% *UI*)** | **Death cases**  **No.×102 (95% *UI*)** | **ASMR per 105**  **No. (95% *UI*)** | **DALYs**  **No.×102 (95% *UI*)** | **ASDR per 105**  **No. (95% *UI*)** | **ASMR**  **No. (95% *CI*)** | **ASDR**  **No. (95% *CI*)** |
| Marshall Islands | 0 (0,0) | 26.49 (17.86,36.69) | 1 (1,1) | 586.59 (404.9,810.7) | 0 (0,0) | 18.56 (12.51,26.46) | 1 (1,2) | 399.75 (277.95,560.16) | -0.93 (-1.04,-0.82) | -1.03 (-1.13,-0.93) |
| Mauritania | 0 (0,1) | 5.29 (3.57,7.48) | 13 (9,18) | 129.61 (91.38,176.69) | 0 (0,1) | 2.47 (1.64,3.44) | 14 (10,19) | 66.77 (46.84,87.69) | -2.38 (-2.78,-1.97) | -2.07 (-2.42,-1.73) |
| Mauritius | 1 (1,1) | 13.14 (10.66,15.7) | 18 (15,21) | 270.91 (222.2,318.88) | 1 (1,1) | 6.27 (5.11,7.54) | 25 (20,30) | 139.78 (113.86,166.49) | -2.35 (-2.7,-2) | -2.15 (-2.45,-1.85) |
| Mexico | 51 (40,61) | 16.61 (12.96,20.24) | 963 (780,1144) | 270.34 (216.99,322.99) | 64 (47,84) | 5.75 (4.2,7.52) | 1239 (939,1585) | 104.68 (79.49,133.8) | -3.57 (-3.82,-3.33) | -3.26 (-3.48,-3.04) |
| Micronesia (Federated States of) | 0 (0,0) | 36.73 (25.64,49.6) | 4 (3,5) | 833.66 (587.62,1115.59) | 0 (0,0) | 20.58 (14.58,27.86) | 4 (3,5) | 482.25 (353.37,643.86) | -2.03 (-2.13,-1.93) | -1.89 (-1.99,-1.78) |
| Monaco | 0 (0,0) | 6.23 (4.34,8.08) | 1 (1,1) | 158.12 (118.62,201.44) | 0 (0,0) | 4.29 (3,5.88) | 1 (1,1) | 112.31 (83.38,150.92) | -1.16 (-1.22,-1.11) | -1.11 (-1.17,-1.04) |
| Mongolia | 1 (1,1) | 11.42 (8.06,15.82) | 27 (19,36) | 259.6 (187.76,350.29) | 1 (1,2) | 6.53 (4.62,8.7) | 33 (25,44) | 152.79 (111.35,200.91) | -2.4 (-2.64,-2.15) | -2.23 (-2.42,-2.03) |
| Montenegro | 0 (0,0) | 2.78 (2.07,3.59) | 6 (5,7) | 94.69 (74.51,116.92) | 0 (0,0) | 2.48 (1.77,3.33) | 9 (7,11) | 87.28 (66.54,110.41) | -0.35 (-0.5,-0.2) | -0.21 (-0.3,-0.12) |
| Morocco | 7 (4,11) | 5.91 (3.5,8.68) | 199 (130,272) | 142.3 (92.59,196.1) | 14 (10,20) | 4.59 (3.15,6.5) | 406 (288,546) | 118.21 (83.82,160.27) | -0.78 (-0.89,-0.66) | -0.55 (-0.67,-0.43) |
| Mozambique | 3 (2,4) | 6.35 (4.29,8.56) | 76 (55,100) | 140.06 (99.04,184.39) | 5 (3,6) | 5.33 (3.8,7.22) | 138 (100,180) | 128.79 (94.46,169.6) | -0.13 (-0.31,0.04) | 0.16 (-0.03,0.34) |
| Myanmar | 129 (95,169) | 73.92 (53.54,97.36) | 2961 (2191,3850) | 1440.76 (1064.11,1864.43) | 154 (115,202) | 40.17 (29.92,53.09) | 3143 (2386,4027) | 726.34 (549.31,934.81) | -2.32 (-2.48,-2.16) | -2.57 (-2.73,-2.41) |
| Namibia | 1 (1,2) | 25.61 (18.47,34.76) | 28 (20,36) | 504.95 (371.34,665.98) | 2 (1,2) | 16.51 (11.92,22.25) | 40 (30,52) | 337.25 (249.79,436.44) | -1.6 (-1.87,-1.32) | -1.5 (-1.76,-1.25) |
| Nauru | 0 (0,0) | 39.07 (26.41,60.55) | 0 (0,1) | 841.59 (591.75,1224.19) | 0 (0,0) | 22.14 (14.47,36.67) | 0 (0,0) | 505.49 (345.07,733.95) | -2.04 (-2.24,-1.85) | -1.86 (-2.08,-1.63) |

**Continued Table S1.** The global burden of COPD attributable to smoking for 204 countries or territories in 1990 and 2021 and the temporal trends during 1990–2021

| **location** | **1990** | | | | **2021** | | | | **EAPC** | |
| --- | --- | --- | --- | --- | --- | --- | --- | --- | --- | --- |
| **Death cases**  **No.×102 (95% *UI*)** | **ASMR per 105**  **No. (95% *UI*)** | **DALYs**  **No.×102 (95% *UI*)** | **ASDR per 105**  **No. (95% *UI*)** | **Death cases**  **No.×102 (95% *UI*)** | **ASMR per 105**  **No. (95% *UI*)** | **DALYs**  **No.×102 (95% *UI*)** | **ASDR per 105**  **No. (95% *UI*)** | **ASMR**  **No. (95% *CI*)** | **ASDR**  **No. (95% *CI*)** |
| Nepal | 61 (41,82) | 88.39 (61.21,118.16) | 1416 (955,1886) | 1745.39 (1217.26,2325.4) | 104 (76,136) | 56.21 (41.32,73.48) | 2159 (1596,2792) | 1030.39 (764.79,1331.23) | -1.54 (-1.7,-1.38) | -1.8 (-1.95,-1.66) |
| Netherlands | 39 (33,46) | 18.82 (15.51,22.04) | 802 (667,931) | 391.78 (326.31,453.64) | 43 (32,56) | 10.93 (8.12,14.04) | 832 (640,1029) | 226.03 (174.68,279.5) | -1.97 (-2.12,-1.82) | -1.82 (-1.95,-1.69) |
| New Zealand | 6 (4,7) | 13.9 (10.89,16.96) | 123 (98,147) | 304.92 (243.99,364.2) | 6 (5,8) | 6.99 (5.14,8.95) | 127 (96,159) | 145.54 (110.92,181.81) | -2.58 (-2.76,-2.39) | -2.71 (-2.88,-2.54) |
| Nicaragua | 1 (0,1) | 4.45 (3.29,5.7) | 13 (10,16) | 92.35 (70.53,116.88) | 2 (1,2) | 3.82 (2.68,5.13) | 36 (26,48) | 79.51 (57.84,104.81) | 0.09 (-0.26,0.43) | -0.07 (-0.33,0.2) |
| Niger | 1 (0,1) | 4.29 (2.48,6.63) | 22 (14,32) | 88.87 (57.18,132.06) | 2 (1,2) | 3.02 (1.72,4.84) | 42 (27,60) | 61.19 (37.9,91.89) | -1.03 (-1.09,-0.96) | -1.11 (-1.19,-1.02) |
| Nigeria | 9 (6,13) | 2.45 (1.6,3.51) | 245 (165,347) | 58.45 (39.61,82.68) | 7 (5,10) | 1 (0.68,1.4) | 267 (190,357) | 29.19 (20.58,39.56) | -2.93 (-3.01,-2.84) | -2.33 (-2.44,-2.22) |
| Niue | 0 (0,0) | 18.43 (13.33,24.84) | 0 (0,0) | 427.93 (313.76,567.51) | 0 (0,0) | 11.71 (8.23,15.96) | 0 (0,0) | 266.71 (195.37,355.45) | -1.77 (-1.89,-1.65) | -1.86 (-1.98,-1.74) |
| North Macedonia | 2 (2,3) | 13.25 (10.31,16.54) | 54 (43,66) | 301.86 (239.54,362.23) | 3 (2,4) | 9.14 (6.34,12.54) | 67 (49,91) | 211.64 (156.1,281.62) | -1.36 (-1.63,-1.09) | -1.28 (-1.44,-1.12) |
| Northern Mariana Islands | 0 (0,0) | 22.44 (16.4,29.67) | 1 (1,1) | 471.86 (356.81,611.53) | 0 (0,0) | 12.21 (8.81,15.89) | 1 (1,2) | 269.53 (201.7,342.14) | -2.05 (-2.11,-1.99) | -1.84 (-1.91,-1.78) |
| Norway | 5 (4,6) | 6.14 (4.99,7.32) | 111 (91,132) | 159.45 (130.95,188.13) | 8 (5,10) | 6.74 (4.79,8.81) | 152 (112,191) | 146.54 (110.03,184.24) | -0.12 (-0.67,0.44) | -0.64 (-1.11,-0.16) |
| Oman | 0 (0,0) | 5.43 (3.69,7.79) | 9 (7,13) | 139 (98.81,192.06) | 0 (0,1) | 3.31 (2.31,4.73) | 16 (11,21) | 83.97 (59.62,112.82) | -0.82 (-1.32,-0.32) | -1.11 (-1.46,-0.76) |
| Pakistan | 191 (119,241) | 40.83 (25.02,52.2) | 4313 (2885,5344) | 830.2 (552.69,1038.55) | 235 (168,310) | 26.38 (18.71,34.71) | 5539 (4007,7202) | 529.64 (385.39,690.08) | -1.7 (-2,-1.39) | -1.72 (-2.01,-1.43) |
| Palau | 0 (0,0) | 22.07 (15.39,29.81) | 0 (0,1) | 463.15 (337.39,618.23) | 0 (0,0) | 15.31 (10.92,20.99) | 1 (0,1) | 318.33 (232.71,428.34) | -1.2 (-1.26,-1.14) | -1.28 (-1.33,-1.23) |
| Palestine | 1 (1,1) | 12.99 (9.37,17.35) | 21 (15,27) | 260.51 (193.44,338.66) | 1 (1,2) | 6.84 (5.16,8.77) | 36 (28,44) | 157.74 (124.4,193.48) | -2.42 (-2.77,-2.07) | -1.91 (-2.15,-1.66) |

**Continued Table S1.** The global burden of COPD attributable to smoking for 204 countries or territories in 1990 and 2021 and the temporal trends during 1990–2021

| **location** | **1990** | | | | **2021** | | | | **EAPC** | |
| --- | --- | --- | --- | --- | --- | --- | --- | --- | --- | --- |
| **Death cases**  **No.×102 (95% *UI*)** | **ASMR per 105**  **No. (95% *UI*)** | **DALYs**  **No.×102 (95% *UI*)** | **ASDR per 105**  **No. (95% *UI*)** | **Death cases**  **No.×102 (95% *UI*)** | **ASMR per 105**  **No. (95% *UI*)** | **DALYs**  **No.×102 (95% *UI*)** | **ASDR per 105**  **No. (95% *UI*)** | **ASMR**  **No. (95% *CI*)** | **ASDR**  **No. (95% *CI*)** |
| Panama | 1 (1,1) | 5.56 (4.19,7.14) | 16 (12,20) | 110.95 (85.33,140.44) | 1 (1,2) | 3.06 (2.05,4.45) | 28 (20,38) | 62.06 (43.82,85.82) | -2.73 (-3.18,-2.29) | -2.65 (-3.01,-2.29) |
| Papua New Guinea | 6 (4,9) | 43.41 (28.47,62.61) | 168 (110,243) | 963.96 (635.37,1380.93) | 12 (8,16) | 29.54 (20.53,41.25) | 321 (226,442) | 658.75 (463.22,915.65) | -1.37 (-1.45,-1.29) | -1.36 (-1.43,-1.28) |
| Paraguay | 2 (1,2) | 9.45 (7.39,11.74) | 37 (30,46) | 180.48 (145,222.14) | 4 (3,6) | 8.13 (5.71,10.87) | 87 (63,115) | 158.43 (114.39,207.94) | -0.28 (-0.44,-0.12) | -0.36 (-0.48,-0.23) |
| Peru | 2 (1,3) | 2.03 (1.33,2.84) | 46 (32,63) | 41.22 (28.37,55.85) | 5 (3,7) | 1.39 (0.81,2.15) | 98 (64,139) | 29.41 (19.07,41.9) | -1.22 (-1.44,-1) | -1.12 (-1.31,-0.93) |
| Philippines | 47 (38,56) | 24.28 (19.18,29.48) | 1201 (990,1424) | 484.67 (394.21,577.41) | 98 (74,124) | 14.35 (10.91,18.12) | 2665 (2078,3290) | 343.04 (266.45,423.57) | -1.49 (-1.62,-1.36) | -1.03 (-1.18,-0.88) |
| Poland | 54 (45,63) | 12.44 (10.28,14.45) | 1392 (1177,1605) | 313.91 (265.3,361.81) | 35 (27,43) | 4.54 (3.55,5.63) | 971 (779,1192) | 134.72 (108.31,165.24) | -2.97 (-3.14,-2.81) | -2.46 (-2.61,-2.32) |
| Portugal | 12 (10,15) | 9 (6.97,11.15) | 294 (231,356) | 209.41 (164.75,254.28) | 10 (7,13) | 3.44 (2.44,4.51) | 206 (151,269) | 85.5 (64.26,108.43) | -3.36 (-3.66,-3.06) | -3.1 (-3.32,-2.89) |
| Puerto Rico | 2 (2,3) | 6.13 (4.38,8.3) | 43 (32,56) | 120.38 (89.71,157.63) | 3 (2,5) | 3.92 (2.67,5.49) | 64 (44,89) | 86.85 (61.06,119.56) | -2.41 (-2.81,-2) | -1.88 (-2.23,-1.52) |
| Qatar | 0 (0,0) | 8.02 (5.32,11.21) | 2 (1,2) | 179.77 (125.74,244.57) | 0 (0,0) | 2.88 (1.83,4.09) | 9 (6,11) | 80.97 (56.53,106.18) | -3.74 (-4.43,-3.04) | -2.71 (-3.17,-2.25) |
| Republic of Korea | 28 (21,35) | 14.74 (10.86,18.97) | 679 (546,822) | 283.16 (221.85,345.9) | 52 (38,68) | 5.69 (4.12,7.47) | 1249 (953,1554) | 133.52 (101.83,166.26) | -3.37 (-3.67,-3.07) | -2.5 (-2.72,-2.27) |
| Republic of Moldova | 6 (5,7) | 14.24 (11.4,17.48) | 167 (136,200) | 364.98 (297.07,438.55) | 3 (2,3) | 4.31 (3.34,5.32) | 72 (57,88) | 121.59 (96.38,147.74) | -4.43 (-4.93,-3.92) | -4.12 (-4.53,-3.71) |
| Romania | 51 (41,62) | 19.8 (15.96,24.75) | 1220 (1002,1455) | 441.13 (361.05,531.54) | 24 (18,30) | 6.43 (4.85,7.95) | 649 (501,791) | 185.91 (144.43,225.47) | -3.7 (-3.99,-3.41) | -2.83 (-3.1,-2.56) |
| Russian Federation | 187 (158,213) | 10.4 (8.72,11.91) | 4839 (4128,5461) | 260.07 (221.41,294.38) | 129 (105,153) | 5.27 (4.26,6.27) | 3408 (2810,4006) | 142.62 (117.68,167.46) | -2.89 (-3.29,-2.49) | -2.71 (-3.11,-2.31) |
| Rwanda | 5 (3,7) | 23.67 (16.09,32.16) | 123 (87,163) | 487.76 (343.62,648.69) | 6 (4,9) | 13.95 (9.39,19.44) | 162 (113,224) | 296.58 (208.89,403.95) | -2.5 (-2.81,-2.19) | -2.42 (-2.73,-2.1) |

**Continued Table S1.** The global burden of COPD attributable to smoking for 204 countries or territories in 1990 and 2021 and the temporal trends during 1990–2021

| **location** | **1990** | | | | **2021** | | | | **EAPC** | |
| --- | --- | --- | --- | --- | --- | --- | --- | --- | --- | --- |
| **Death cases**  **No.×102 (95% *UI*)** | **ASMR per 105**  **No. (95% *UI*)** | **DALYs**  **No.×102 (95% *UI*)** | **ASDR per 105**  **No. (95% *UI*)** | **Death cases**  **No.×102 (95% *UI*)** | **ASMR per 105**  **No. (95% *UI*)** | **DALYs**  **No.×102 (95% *UI*)** | **ASDR per 105**  **No. (95% *UI*)** | **ASMR**  **No. (95% *CI*)** | **ASDR**  **No. (95% *CI*)** |
| Saint Kitts and Nevis | 0 (0,0) | 2.68 (1.83,3.64) | 0 (0,0) | 58.56 (41.5,77.66) | 0 (0,0) | 2.74 (1.85,3.77) | 0 (0,1) | 60.09 (41.61,81.45) | -0.07 (-0.3,0.15) | -0.08 (-0.27,0.11) |
| Saint Lucia | 0 (0,0) | 6.63 (4.8,8.62) | 1 (1,2) | 138.84 (103,177.96) | 0 (0,0) | 5.27 (3.58,7.29) | 3 (2,4) | 117.31 (82.63,157.07) | -1.38 (-1.69,-1.06) | -0.97 (-1.21,-0.73) |
| Saint Vincent and the Grenadines | 0 (0,0) | 1.36 (0.97,1.77) | 0 (0,0) | 33.12 (24.23,41.89) | 0 (0,0) | 2.3 (1.62,3.13) | 1 (1,1) | 52.57 (38,69.52) | 1.24 (0.86,1.63) | 1.13 (0.78,1.47) |
| Samoa | 0 (0,0) | 35.83 (25.64,46.81) | 6 (5,8) | 763.12 (560.07,975.47) | 0 (0,0) | 21.98 (15.92,28.48) | 7 (5,8) | 472.47 (356.45,599.27) | -1.81 (-1.91,-1.7) | -1.75 (-1.85,-1.65) |
| San Marino | 0 (0,0) | 5.33 (3.84,7) | 0 (0,1) | 132.37 (99.99,167.2) | 0 (0,0) | 1.94 (1.21,2.9) | 0 (0,1) | 64.45 (44.5,86.78) | -2.28 (-2.64,-1.93) | -1.89 (-2.06,-1.71) |
| Sao Tome and Principe | 0 (0,0) | 5.25 (3.61,7.25) | 1 (1,1) | 129.6 (91.59,177.27) | 0 (0,0) | 5.5 (3.48,7.99) | 2 (1,2) | 136.45 (90.48,193.61) | 0.15 (-0.18,0.48) | 0.07 (-0.25,0.38) |
| Saudi Arabia | 3 (2,5) | 6.79 (4.28,9.85) | 92 (61,130) | 160.24 (104.3,227.49) | 8 (5,10) | 4.96 (3.38,6.66) | 290 (205,386) | 133.8 (95.32,176.54) | -1.17 (-1.27,-1.06) | -0.58 (-0.68,-0.49) |
| Senegal | 2 (1,2) | 5.01 (3.5,7.21) | 46 (33,63) | 137.03 (98.52,188.93) | 2 (1,3) | 2.52 (1.58,3.6) | 60 (40,81) | 73.72 (49.24,100.29) | -2.07 (-2.44,-1.7) | -1.9 (-2.2,-1.6) |
| Serbia | 12 (9,16) | 12.96 (9.72,16.34) | 319 (245,392) | 294.65 (228.1,363.32) | 13 (10,17) | 7.7 (5.69,9.72) | 342 (263,421) | 207.25 (160.01,254.69) | -1.7 (-1.88,-1.53) | -1.2 (-1.36,-1.04) |
| Seychelles | 0 (0,0) | 16.28 (12.55,20.12) | 2 (2,2) | 347.24 (268.23,427.69) | 0 (0,0) | 9.8 (7.6,12.19) | 2 (2,3) | 218.08 (171.37,264.07) | -1.7 (-1.87,-1.52) | -1.59 (-1.74,-1.44) |
| Sierra Leone | 1 (1,2) | 6.56 (4.6,8.92) | 32 (24,43) | 160.5 (116.48,212.36) | 1 (1,2) | 3.32 (2.2,4.8) | 35 (25,48) | 92.17 (64.4,125.19) | -1.88 (-2.07,-1.7) | -1.49 (-1.66,-1.32) |
| Singapore | 3 (2,3) | 14.8 (10.99,18.9) | 61 (47,75) | 301.81 (229.34,375.12) | 1 (1,2) | 1.52 (1.09,1.99) | 36 (27,46) | 41.27 (30.87,52.98) | -7.31 (-7.44,-7.18) | -6.46 (-6.59,-6.34) |
| Slovakia | 3 (3,4) | 5.67 (4.41,6.82) | 91 (71,110) | 152.44 (119.3,182.86) | 3 (3,4) | 3.52 (2.65,4.41) | 98 (76,122) | 102.91 (79.58,127.73) | -1.11 (-1.28,-0.95) | -0.93 (-1.06,-0.8) |
| Slovenia | 2 (2,3) | 9.2 (7.01,11.48) | 59 (46,71) | 237.09 (184.22,287.14) | 1 (1,2) | 3.08 (2.22,4.11) | 41 (30,53) | 94.61 (71.41,121.78) | -3.96 (-4.19,-3.73) | -3.18 (-3.33,-3.03) |

**Continued Table S1.** The global burden of COPD attributable to smoking for 204 countries or territories in 1990 and 2021 and the temporal trends during 1990–2021

| **location** | **1990** | | | | **2021** | | | | **EAPC** | |
| --- | --- | --- | --- | --- | --- | --- | --- | --- | --- | --- |
| **Death cases**  **No.×102 (95% *UI*)** | **ASMR per 105**  **No. (95% *UI*)** | **DALYs**  **No.×102 (95% *UI*)** | **ASDR per 105**  **No. (95% *UI*)** | **Death cases**  **No.×102 (95% *UI*)** | **ASMR per 105**  **No. (95% *UI*)** | **DALYs**  **No.×102 (95% *UI*)** | **ASDR per 105**  **No. (95% *UI*)** | **ASMR**  **No. (95% *CI*)** | **ASDR**  **No. (95% *CI*)** |
| Solomon Islands | 0 (0,0) | 32.27 (23.26,42.38) | 9 (6,12) | 706.33 (515.66,928.58) | 1 (0,1) | 21.78 (15.8,28.66) | 16 (12,21) | 494.75 (365.38,636.85) | -1.24 (-1.35,-1.12) | -1.1 (-1.24,-0.96) |
| Somalia | 2 (1,3) | 12.96 (6.83,20.19) | 60 (35,91) | 284.51 (161.05,437.95) | 4 (2,5) | 7.51 (3.91,11.6) | 109 (62,161) | 184.98 (103.44,272.92) | -1.72 (-1.82,-1.62) | -1.41 (-1.5,-1.32) |
| South Africa | 27 (22,34) | 15.4 (12.16,19.3) | 724 (592,872) | 363.75 (295.27,439.69) | 35 (27,43) | 8.41 (6.45,10.73) | 1001 (785,1239) | 217.59 (169.01,271.19) | -2.4 (-2.81,-1.99) | -2 (-2.33,-1.67) |
| South Sudan | 3 (2,4) | 11.83 (7.14,17.92) | 63 (39,93) | 254.78 (157.34,375.61) | 2 (1,3) | 7.75 (4.48,11.92) | 60 (37,89) | 170.84 (105.41,259.74) | -1.6 (-1.82,-1.38) | -1.56 (-1.81,-1.31) |
| Spain | 93 (76,109) | 16.71 (13.62,19.65) | 1852 (1541,2142) | 332.67 (276.39,384.72) | 87 (63,111) | 7.05 (5.27,8.92) | 1536 (1171,1913) | 147.65 (114.79,180.08) | -2.93 (-3.12,-2.74) | -2.74 (-2.89,-2.59) |
| Sri Lanka | 22 (18,28) | 28.14 (22.17,34.94) | 480 (383,591) | 512.9 (408.25,632.87) | 27 (17,38) | 11.3 (7.18,15.87) | 545 (358,755) | 210.93 (139.76,290.42) | -2.47 (-2.69,-2.26) | -2.65 (-2.84,-2.46) |
| Sudan | 8 (4,14) | 10.66 (4.97,17.28) | 227 (123,350) | 250.64 (133.21,385.6) | 12 (7,18) | 7.44 (4.73,11.72) | 324 (217,478) | 174.15 (116.26,258.24) | -1.3 (-1.41,-1.2) | -1.35 (-1.46,-1.24) |
| Suriname | 0 (0,0) | 6.46 (4.91,8.12) | 4 (3,4) | 145.83 (112.88,181.2) | 0 (0,0) | 4.26 (2.86,6.06) | 7 (5,9) | 104.96 (74.13,142.94) | -1.32 (-1.6,-1.04) | -1.08 (-1.34,-0.82) |
| Sweden | 8 (6,10) | 4.69 (3.67,5.75) | 220 (172,270) | 143.66 (112.8,175.17) | 12 (9,16) | 4.8 (3.47,6.17) | 293 (218,371) | 129.07 (97.4,161.77) | 0.1 (-0.25,0.44) | -0.36 (-0.65,-0.07) |
| Switzerland | 11 (9,13) | 9.99 (8,11.89) | 248 (201,297) | 234.14 (190.99,279.86) | 11 (8,13) | 4.89 (3.66,6.14) | 236 (183,293) | 124.89 (97.55,153.82) | -2.1 (-2.23,-1.98) | -1.91 (-2,-1.82) |
| Syrian Arab Republic | 5 (3,6) | 10.87 (7.83,14.74) | 125 (95,165) | 249.9 (188.53,330.02) | 9 (6,12) | 9.42 (6.37,12.58) | 251 (181,329) | 207.33 (149.73,270.16) | -0.73 (-0.89,-0.56) | -0.87 (-0.99,-0.75) |
| Taiwan (Province of China) | 15 (12,17) | 12.68 (10.55,14.61) | 336 (284,389) | 245.41 (206.27,282.8) | 35 (28,42) | 7.7 (6.13,9.27) | 594 (482,707) | 135.36 (110.35,160.89) | -1.84 (-2.12,-1.55) | -2.13 (-2.35,-1.91) |
| Tajikistan | 4 (3,5) | 15.02 (10.96,19.57) | 91 (68,114) | 336.38 (251.79,424.33) | 3 (2,5) | 7.15 (4.47,10.67) | 84 (59,121) | 155.27 (106.65,223.77) | -2.46 (-2.76,-2.16) | -2.66 (-2.94,-2.39) |
| Thailand | 82 (64,98) | 29.22 (22.85,35.21) | 1931 (1520,2284) | 602.13 (475.8,710.66) | 91 (65,125) | 8.4 (6.04,11.52) | 1961 (1447,2627) | 180.85 (133.79,241.53) | -4.84 (-5.12,-4.55) | -4.58 (-4.83,-4.34) |

**Continued Table S1.** The global burden of COPD attributable to smoking for 204 countries or territories in 1990 and 2021 and the temporal trends during 1990–2021

| **location** | **1990** | | | | **2021** | | | | **EAPC** | |
| --- | --- | --- | --- | --- | --- | --- | --- | --- | --- | --- |
| **Death cases**  **No.×102 (95% *UI*)** | **ASMR per 105**  **No. (95% *UI*)** | **DALYs**  **No.×102 (95% *UI*)** | **ASDR per 105**  **No. (95% *UI*)** | **Death cases**  **No.×102 (95% *UI*)** | **ASMR per 105**  **No. (95% *UI*)** | **DALYs**  **No.×102 (95% *UI*)** | **ASDR per 105**  **No. (95% *UI*)** | **ASMR**  **No. (95% *CI*)** | **ASDR**  **No. (95% *CI*)** |
| Timor-Leste | 0 (0,1) | 23.37 (13.39,31.25) | 11 (6,14) | 466.73 (276.6,615.2) | 1 (1,2) | 19.04 (13.36,25.83) | 30 (21,39) | 375.5 (270.48,491.86) | -0.62 (-0.7,-0.55) | -0.68 (-0.77,-0.58) |
| Togo | 1 (1,1) | 9.92 (6.98,13.54) | 26 (18,35) | 224.17 (161.15,303.25) | 2 (1,2) | 5.38 (3.48,7.46) | 53 (37,72) | 138.37 (95.99,188.05) | -1.89 (-2.03,-1.75) | -1.47 (-1.6,-1.34) |
| Tokelau | 0 (0,0) | 21.18 (13.66,32.7) | 0 (0,0) | 447.63 (295.48,668.46) | 0 (0,0) | 11.36 (7.31,16.3) | 0 (0,0) | 247.3 (167.33,341.28) | -2.26 (-2.37,-2.15) | -2.17 (-2.27,-2.08) |
| Tonga | 0 (0,0) | 32.9 (24.68,41.3) | 3 (2,4) | 640.22 (489.95,794.09) | 0 (0,0) | 22.01 (16.74,28.04) | 3 (3,4) | 426.26 (327.71,537.42) | -1.37 (-1.54,-1.2) | -1.37 (-1.51,-1.22) |
| Trinidad and Tobago | 0 (0,0) | 4.45 (3.36,5.61) | 8 (6,10) | 96.78 (75.03,117.25) | 1 (0,1) | 2.88 (1.93,4.01) | 14 (10,19) | 71.63 (50.58,96.47) | -1.57 (-1.75,-1.39) | -1.15 (-1.31,-0.99) |
| Tunisia | 3 (3,4) | 8.71 (6.57,11.19) | 92 (72,115) | 200.47 (157.46,251.51) | 9 (6,12) | 7.39 (5.04,10.36) | 229 (170,304) | 178.77 (133.41,235.91) | -0.75 (-0.9,-0.59) | -0.5 (-0.6,-0.4) |
| Türkiye | 77 (59,96) | 26.28 (19.94,32.75) | 1885 (1477,2288) | 570.92 (443.18,695.34) | 131 (97,174) | 15.23 (11.17,20.17) | 3053 (2356,3911) | 331.17 (256.16,425.83) | -1.57 (-1.9,-1.25) | -1.66 (-1.9,-1.42) |
| Turkmenistan | 2 (2,2) | 11.36 (8.95,13.87) | 52 (42,63) | 270.24 (217.35,326.45) | 1 (1,1) | 2.68 (1.85,3.65) | 31 (22,42) | 74.96 (52.9,99.55) | -5.6 (-6.21,-4.99) | -5.01 (-5.51,-4.51) |
| Tuvalu | 0 (0,0) | 30.47 (20.98,41.74) | 0 (0,1) | 688.85 (480.67,932.23) | 0 (0,0) | 16.32 (11.44,22.2) | 0 (0,0) | 365.55 (262.68,489.36) | -2.1 (-2.18,-2.02) | -2.13 (-2.23,-2.04) |
| Uganda | 4 (2,6) | 8.08 (4.89,12.28) | 101 (65,148) | 171.37 (110.3,249.31) | 5 (3,7) | 4.27 (2.74,6.27) | 139 (95,198) | 100.71 (68.45,142.86) | -2.82 (-3.14,-2.5) | -2.5 (-2.83,-2.17) |
| Ukraine | 134 (112,155) | 18.98 (15.93,21.94) | 3156 (2691,3655) | 436.76 (372.51,503.93) | 29 (19,40) | 3.64 (2.41,5.08) | 761 (522,1042) | 100.34 (69.02,137.36) | -6.83 (-7.44,-6.21) | -6.26 (-6.86,-5.65) |
| United Arab Emirates | 0 (0,1) | 12.57 (8.14,18.65) | 16 (11,22) | 301.4 (206.68,433.08) | 1 (1,2) | 7.15 (4.37,10.41) | 70 (51,91) | 163.63 (117.7,219.99) | -0.31 (-0.96,0.35) | -1.11 (-1.59,-0.63) |
| United Kingdom | 184 (151,215) | 18.74 (15.4,21.87) | 3883 (3197,4492) | 414.28 (341.78,480.02) | 150 (113,191) | 10.23 (7.8,12.86) | 3133 (2439,3837) | 233.44 (183.29,283.81) | -1.8 (-1.9,-1.71) | -1.74 (-1.81,-1.68) |
| United Republic of Tanzania | 7 (5,9) | 8.5 (5.96,11.21) | 190 (136,244) | 188.6 (135.78,240.5) | 9 (6,13) | 4.38 (3.09,6.08) | 264 (188,357) | 107.99 (77.65,145.68) | -2.61 (-2.79,-2.43) | -2.24 (-2.4,-2.08) |

**Continued Table S1.** The global burden of COPD attributable to smoking for 204 countries or territories in 1990 and 2021 and the temporal trends during 1990–2021

| **location** | **1990** | | | | **2021** | | | | **EAPC** | |
| --- | --- | --- | --- | --- | --- | --- | --- | --- | --- | --- |
| **Death cases**  **No.×102 (95% *UI*)** | **ASMR per 105**  **No. (95% *UI*)** | **DALYs**  **No.×102 (95% *UI*)** | **ASDR per 105**  **No. (95% *UI*)** | **Death cases**  **No.×102 (95% *UI*)** | **ASMR per 105**  **No. (95% *UI*)** | **DALYs**  **No.×102 (95% *UI*)** | **ASDR per 105**  **No. (95% *UI*)** | **ASMR**  **No. (95% *CI*)** | **ASDR**  **No. (95% *CI*)** |
| United States of America | 435 (349,526) | 12.96 (10.42,15.62) | 11986 (9625,14308) | 373.61 (300.97,443.36) | 743 (554,941) | 11.91 (8.94,15.02) | 19119 (14777,23697) | 321.75 (249.96,397.63) | -0.34 (-0.53,-0.14) | -0.49 (-0.65,-0.32) |
| United States Virgin Islands | 0 (0,0) | 2.93 (1.88,4.25) | 1 (0,1) | 66.84 (45.36,94.59) | 0 (0,0) | 1.5 (0.89,2.23) | 1 (0,1) | 39.04 (24.42,55.35) | -2.24 (-2.55,-1.92) | -1.81 (-2.05,-1.58) |
| Uruguay | 5 (4,6) | 11.94 (9.36,14.41) | 112 (90,133) | 286.09 (230.37,337.93) | 6 (5,8) | 10.71 (8.2,13.14) | 131 (102,159) | 244.81 (191.66,295.9) | -0.55 (-0.74,-0.36) | -0.67 (-0.81,-0.52) |
| Uzbekistan | 4 (3,6) | 4.09 (2.85,5.57) | 118 (85,156) | 102.44 (73.5,136.27) | 4 (3,5) | 1.87 (1.32,2.48) | 128 (93,163) | 49.97 (36.65,64.09) | -3.6 (-4.43,-2.75) | -3.42 (-4.16,-2.67) |
| Vanuatu | 0 (0,0) | 31.49 (20.25,43.37) | 4 (3,5) | 671.63 (433.97,919.47) | 0 (0,0) | 17.21 (11.21,22.96) | 6 (4,8) | 372.45 (245.44,486.73) | -2.19 (-2.31,-2.08) | -2.16 (-2.27,-2.05) |
| Venezuela (Bolivarian Republic of) | 5 (4,6) | 5.98 (4.58,7.5) | 121 (94,148) | 132.13 (102.5,161.73) | 14 (9,20) | 4.92 (3.3,7) | 315 (218,431) | 106.85 (73.9,146.92) | -0.99 (-1.4,-0.57) | -1.05 (-1.41,-0.69) |
| Viet Nam | 81 (60,104) | 22.76 (17.04,29.17) | 1710 (1289,2207) | 447.49 (337.69,574.78) | 140 (105,181) | 16.72 (12.51,21.61) | 3154 (2390,4070) | 339.08 (260.1,436.21) | -1.17 (-1.28,-1.06) | -1.01 (-1.08,-0.94) |
| Yemen | 6 (3,8) | 14.02 (7.76,19.92) | 172 (108,235) | 351.41 (215.57,484.12) | 14 (9,19) | 12.18 (8.04,17.17) | 389 (273,527) | 286.46 (199.68,389.42) | -0.43 (-0.51,-0.36) | -0.67 (-0.74,-0.61) |
| Zambia | 2 (1,2) | 8.05 (5.45,10.85) | 46 (32,60) | 178.45 (123.43,235.86) | 3 (2,4) | 5.91 (3.98,8.3) | 84 (59,111) | 135.48 (94.88,181.03) | -1.23 (-1.45,-1.02) | -1.22 (-1.45,-0.99) |
| Zimbabwe | 3 (2,4) | 10.66 (7.5,14.47) | 87 (65,112) | 240.13 (179.09,317.35) | 5 (4,7) | 9.78 (7,13.2) | 142 (107,180) | 230.2 (172.02,300.35) | 0.08 (-0.22,0.38) | 0.06 (-0.21,0.33) |

Bold text indicates row headers and subgroup labels and is used for formatting purposes only. ASMR, age-standardized mortality rate; ASDR, age-standardized DALYs rate; DALYs, disability-adjusted life years; No., number; EAPC, estimated annual percentage change; UI, Uncertainty interval; SDI, Socio-demographic Index; CI, Confidence interval.

**Table S2.** Top 10 countries or territories exhibiting the highest number of COPD deaths attributable to smoking in 1990 and 2021

| **Year** | **Location** | **No.×102 (95% *UI*)** |
| --- | --- | --- |
| 1990 | China | 5387 (4398,6465) |
|  | India | 1500 (1076,1894) |
|  | United States of America | 435 (349,526) |
|  | Pakistan | 191 (119,241) |
|  | Bangladesh | 190 (140,237) |
|  | Russian Federation | 187 (158,213) |
|  | United Kingdom | 184 (151,215) |
|  | Brazil | 165 (135,196) |
|  | Indonesia | 150 (107,189) |
|  | Germany | 140 (112,166) |
| 2021 | China | 5632 (4154,7153) |
|  | India | 3091 (2385,3880) |
|  | United States of America | 743 (554,941) |
|  | Indonesia | 354 (266,442) |
|  | Bangladesh | 272 (198,359) |
|  | Pakistan | 235 (168,310) |
|  | Brazil | 197 (148,252) |
|  | Myanmar | 154 (115,202) |
|  | United Kingdom | 150 (113,191) |
|  | Germany | 148 (113,184) |

COPD, chronic obstructive pulmonary disease; UI, Uncertainty interval.

**Table S3.** Top 10 countries or territories exhibiting the highest number of COPD DALYs attributable to smoking in 1990 and 2021

| **Year** | **Location** | **No.×103 (95% *UI*)** |
| --- | --- | --- |
| 1990 | China | 11244 (9211,13456) |
|  | India | 3657 (2684,4553) |
|  | United States of America | 1199 (962,1431) |
|  | Russian Federation | 484 (413,546) |
|  | Bangladesh | 441 (334,553) |
|  | Pakistan | 431 (289,534) |
|  | United Kingdom | 388 (320,449) |
|  | Brazil | 379 (313,440) |
|  | Indonesia | 371 (272,459) |
|  | Ukraine | 316 (269,366) |
| 2021 | China | 10187 (7747,12691) |
|  | India | 6682 (5199,8310) |
|  | United States of America | 1912 (1478,2370) |
|  | Indonesia | 876 (669,1090) |
|  | Bangladesh | 598 (449,772) |
|  | Pakistan | 554 (401,720) |
|  | Brazil | 441 (336,554) |
|  | Russian Federation | 341 (281,401) |
|  | Germany | 338 (263,416) |
|  | Viet Nam | 315 (239,407) |

COPD, chronic obstructive pulmonary disease; DALYs, disability-adjusted life years; UI, Uncertainty interval.

**Table S4.** Top 10 countries or territories exhibiting the highest COPD ASMR per 100,000 attributable to smoking in 1990 and 2021

| **Year** | **Location** | **No. (95% *UI*)** |
| --- | --- | --- |
| 1990 | China | 96.37 (77.06,115.04) |
|  | Nepal | 88.39 (61.21,118.16) |
|  | Myanmar | 73.92 (53.54,97.36) |
|  | Democratic People's Republic of Korea | 46.73 (33.69,60.96) |
|  | Bangladesh | 46.58 (34.19,58.36) |
|  | Kiribati | 44.91 (30.14,77.01) |
|  | India | 43.69 (31.48,55.74) |
|  | Maldives | 43.50 (29.92,57.53) |
|  | Greenland | 43.46 (32.31,54.00) |
|  | Papua New Guinea | 43.41 (28.47,62.61) |
| 2021 | Nepal | 56.21 (41.32,73.48) |
|  | Myanmar | 40.17 (29.92,53.09) |
|  | Kiribati | 34.86 (24.96,62.55) |
|  | China | 31.17 (23.05,39.35) |
|  | India | 31.03 (23.87,38.92) |
|  | Democratic People's Republic of Korea | 30.09 (21.88,40.26) |
|  | Papua New Guinea | 29.54 (20.53,41.25) |
|  | Lao People's Democratic Republic | 26.38 (19.27,34.15) |
|  | Pakistan | 26.38 (18.71,34.71) |
|  | Lesotho | 25.83 (17.20,34.59) |

COPD, chronic obstructive pulmonary disease; ASMR, age-standardized mortality rate; UI, Uncertainty interval.

**Table S5.** Top 10 countries or territories exhibiting the highest COPD ASDR per 100,000 attributable to smoking in 1990 and 2021

| **Year** | **Location** | **No. (95% *UI*)** |
| --- | --- | --- |
| 1990 | Nepal | 1745.39 (1217.26,2325.40) |
|  | China | 1627.97 (1325.04,1940.55) |
|  | Myanmar | 1440.76 (1064.11,1864.43) |
|  | Bangladesh | 1003.12 (761.80,1256.52) |
|  | Kiribati | 978.21 (671.01,1572.59) |
|  | Papua New Guinea | 963.96 (635.37,1380.93) |
|  | Greenland | 944.09 (727.87,1144.49) |
|  | India | 897.55 (659.67,1126.29) |
|  | Democratic People's Republic of Korea | 891.57 (658.00,1144.63) |
|  | Nauru | 841.59 (591.75,1224.19) |
| 2021 | Nepal | 1030.39 (764.79,1331.23) |
|  | Kiribati | 741.91 (549.10,1246.66) |
|  | Myanmar | 726.34 (549.31,934.81) |
|  | Papua New Guinea | 658.75 (463.22,915.65) |
|  | Democratic People's Republic of Korea | 619.31 (457.97,802.32) |
|  | India | 604.96 (471.22,750.44) |
|  | Lesotho | 588.94 (411.51,779.81) |
|  | Pakistan | 529.64 (385.39,690.08) |
|  | Lao People's Democratic Republic | 527.58 (381.93,670.65) |
|  | China | 515.69 (392.02,643.38) |

COPD, chronic obstructive pulmonary disease; ASDR, age-standardized DALYs rate; UI, Uncertainty interval.

**Table S6.** Top 10 countries or territories exhibiting the highest or lowest EAPC in COPD ASMR per 100,000 attributable to smoking from 1990 to 2021

| **Location** | **No. (95% *UI*)** |
| --- | --- |
| Georgia | 3.92 (3.09,4.76) |
| Saint Vincent and the Grenadines | 1.24 (0.86,1.63) |
| Lesotho | 1.12 (0.86,1.39) |
| Belize | 0.87 (0.23,1.51) |
| Honduras | 0.81 (0.61,1.02) |
| Mali | 0.78 (0.63,0.93) |
| Ghana | 0.76 (0.36,1.16) |
| Greece | 0.72 (-0.04,1.49) |
| Libya | 0.65 (0.41,0.88) |
| Antigua and Barbuda | 0.60 (0.37,0.84) |
| Slovenia | -3.96 (-4.19,-3.37) |
| Cabo Verde | -3.96 (-4.90,-3.00) |
| China | -4.12 (-4.31,-3.92) |
| Ireland | -4.24 (-4.52,-3.97) |
| Republic of Moldova | -4.43 (-4.93,-3.92) |
| Thailand | -4.84 (-5.12,-4.55) |
| Turkmenistan | -5.60 (-6.21,-4.99) |
| Belarus | -6.37 (-7.06,-5.68) |
| Ukraine | -6.83 (-7.44,-6.21) |
| Singapore | -7.31 (-7.44,-7.18) |

COPD, chronic obstructive pulmonary disease; EAPC, estimated annual percentage change; ASMR, age-standardized mortality rate; UI, Uncertainty interval.

**Table S7.** Top 10 countries or territories exhibiting the highest or lowest EAPC in COPD ASDR per 100,000 attributable to smoking from 1990 to 2021

| **Location** | **No. (95% *UI*)** |
| --- | --- |
| Georgia | 3.08 (2.45,3.72) |
| Lesotho | 1.32 (1.06,1.59) |
| Saint Vincent and the Grenadines | 1.13 (0.78,1.47) |
| Ghana | 0.88 (0.53,1.23) |
| Belize | 0.76 (0.19,1.33) |
| Mali | 0.76 (0.62,0.91) |
| Greece | 0.66 (0.15,1.18) |
| Guyana | 0.66 (0.43,0.89) |
| Honduras | 0.57 (0.39,0.75) |
| Antigua and Barbuda | 0.52 (0.35,0.70) |
| Maldives | -3.88 (-4.06,-3.70) |
| Ireland | -4.08 (-4.31,-3.85) |
| Republic of Moldova | -4.12 (-4.53,-3.71) |
| China | -4.14 (-4.30,-3.98) |
| Kyrgyzstan | -4.17 (-4.75,-3.58) |
| Thailand | -4.58 (-4.83,-4.34) |
| Turkmenistan | -5.01 (-5.51,-4.51) |
| Belarus | -5.65 (-6.28,-5.02) |
| Ukraine | -6.26 (-6.86,-5.65) |
| Singapore | -6.46 (-6.59,-6.34) |

COPD, chronic obstructive pulmonary disease; EAPC, estimated annual percentage change; ASDR, age-standardized DALYs rate; UI, Uncertainty interval.

**Table S8.** DALYs of smoking-related COPD with decomposition analysis, categorized by global and SDI regions

| **location** | **Overall difference** | **Aging** | **Population** | **Epidemiological change** | **Percent change of aging** | **Percent change of population** | **Percent change of epidemiological change** |
| --- | --- | --- | --- | --- | --- | --- | --- |
| Global | 4194278.21 | 4978415.504 | 17521137 | -18305274.29 | 118.7 | 417.74 | -436.43 |
| High SDI | 719227.88 | 910890.705 | 1501679.307 | -1693342.131 | 126.65 | 208.79 | -235.44 |
| High-middle SDI | -740358.89 | 1543975.935 | 3336096.503 | -5620431.33 | -208.54 | -450.61 | 759.15 |
| Middle SDI | 730845.74 | 3021481.869 | 7778476.948 | -10069113.08 | 413.42 | 1064.31 | -1377.73 |
| Low-middle SDI | 2968385.01 | 739815.931 | 4458094.605 | -2229525.525 | 24.92 | 150.19 | -75.11 |
| Low SDI | 515057.94 | -61665.093 | 1093213.065 | -516490.036 | -11.97 | 212.25 | -100.28 |

COPD, chronic obstructive pulmonary disease; SDI, Socio-demographic Index.

**Table S9.** Projections for ASMR, 2022-2040

| **Sex** | **Year** | **Mean** | **SD** | **Upper** | **Lower** |
| --- | --- | --- | --- | --- | --- |
| Both | 2022 | 15.69895 | 2.20E-06 | 16.12978 | 15.26812 |
|  | 2023 | 15.46636 | 3.14E-06 | 16.08185 | 14.85087 |
|  | 2024 | 15.23712 | 4.34E-06 | 16.08834 | 14.3859 |
|  | 2025 | 15.00762 | 5.72E-06 | 16.1287 | 13.88654 |
|  | 2026 | 14.77194 | 7.23E-06 | 16.18811 | 13.35577 |
|  | 2027 | 14.53172 | 8.83E-06 | 16.26319 | 12.80024 |
|  | 2028 | 14.2965 | 1.05E-05 | 16.35803 | 12.23497 |
|  | 2029 | 14.06523 | 1.23E-05 | 16.46791 | 11.66255 |
|  | 2030 | 13.83711 | 1.40E-05 | 16.5898 | 11.08441 |
|  | 2031 | 13.60747 | 1.59E-05 | 16.71696 | 10.49797 |
|  | 2032 | 13.37512 | 1.77E-05 | 16.84684 | 9.903401 |
|  | 2033 | 13.14729 | 1.96E-05 | 16.98523 | 9.30935 |
|  | 2034 | 12.92402 | 2.15E-05 | 17.13053 | 8.71751 |
|  | 2035 | 12.70517 | 2.33E-05 | 17.2817 | 8.128651 |
|  | 2036 | 12.48704 | 2.52E-05 | 17.43341 | 7.540666 |
|  | 2037 | 12.26753 | 2.71E-05 | 17.58237 | 6.952687 |
|  | 2038 | 12.05042 | 2.90E-05 | 17.73171 | 6.369124 |
|  | 2039 | 11.83517 | 3.08E-05 | 17.87937 | 5.790957 |
|  | 2040 | 11.62244 | 3.27E-05 | 18.02568 | 5.219209 |
| Male | 2022 | 30.43174 | 4.67E-06 | 31.34686 | 29.51663 |
|  | 2023 | 30.03699 | 6.60E-06 | 31.33152 | 28.74245 |
|  | 2024 | 29.64517 | 9.09E-06 | 31.42756 | 27.86279 |
|  | 2025 | 29.24874 | 1.20E-05 | 31.59235 | 26.90514 |
|  | 2026 | 28.84142 | 1.51E-05 | 31.8009 | 25.88193 |
|  | 2027 | 28.42804 | 1.85E-05 | 32.04744 | 24.80864 |
|  | 2028 | 28.02344 | 2.20E-05 | 32.33597 | 23.71091 |
|  | 2029 | 27.62409 | 2.57E-05 | 32.65566 | 22.59252 |
|  | 2030 | 27.22798 | 2.94E-05 | 32.99989 | 21.45606 |
|  | 2031 | 26.8297 | 3.33E-05 | 33.3595 | 20.2999 |
|  | 2032 | 26.42809 | 3.73E-05 | 33.73057 | 19.12561 |
|  | 2033 | 26.03418 | 4.13E-05 | 34.12105 | 17.94731 |
|  | 2034 | 25.64754 | 4.53E-05 | 34.52726 | 16.76783 |
|  | 2035 | 25.26785 | 4.94E-05 | 34.94707 | 15.58864 |
|  | 2036 | 24.89031 | 5.35E-05 | 35.37314 | 14.40749 |
|  | 2037 | 24.51162 | 5.76E-05 | 35.79988 | 13.22337 |
|  | 2038 | 24.13641 | 6.17E-05 | 36.22981 | 12.04301 |
|  | 2039 | 23.76301 | 6.58E-05 | 36.658 | 10.86802 |
|  | 2040 | 23.39236 | 6.99E-05 | 37.08444 | 9.70028 |
| Female | 2022 | 4.850102 | 7.35E-07 | 4.994232 | 4.705972 |
|  | 2023 | 4.736518 | 1.00E-06 | 4.93263 | 4.540406 |
|  | 2024 | 4.625645 | 1.33E-06 | 4.886973 | 4.364317 |
|  | 2025 | 4.518583 | 1.71E-06 | 4.853706 | 4.183461 |
|  | 2026 | 4.413604 | 2.12E-06 | 4.828666 | 3.998541 |
|  | 2027 | 4.309357 | 2.55E-06 | 4.80899 | 3.809724 |
|  | 2028 | 4.206159 | 2.99E-06 | 4.792876 | 3.619442 |
|  | 2029 | 4.104965 | 3.44E-06 | 4.78018 | 3.42975 |
|  | 2030 | 4.007284 | 3.90E-06 | 4.772054 | 3.242513 |
|  | 2031 | 3.911517 | 4.36E-06 | 4.766474 | 3.056561 |
|  | 2032 | 3.815698 | 4.82E-06 | 4.760862 | 2.870534 |
|  | 2033 | 3.720078 | 5.28E-06 | 4.75442 | 2.685736 |
|  | 2034 | 3.625555 | 5.72E-06 | 4.747601 | 2.503509 |

**Continued Table S9.** Projections for ASMR, 2022-2040

| **Sex** | **Year** | **Mean** | **SD** | **Upper** | **Lower** |
| --- | --- | --- | --- | --- | --- |
| Female | 2035 | 3.533627 | 6.17E-06 | 4.742081 | 2.325173 |
|  | 2036 | 3.443445 | 6.60E-06 | 4.736777 | 2.150112 |
|  | 2037 | 3.35363 | 7.02E-06 | 4.729789 | 1.977472 |
|  | 2038 | 3.264841 | 7.43E-06 | 4.721351 | 1.808331 |
|  | 2039 | 3.177517 | 7.83E-06 | 4.711705 | 1.643329 |
|  | 2040 | 3.092285 | 8.21E-06 | 4.701652 | 1.482919 |

ASMR, age-standardized mortality rate.**Table S10.** Projections for ASDR, 2022-2040

| **Sex** | **Year** | **Mean** | **SD** | **Upper** | **Lower** |
| --- | --- | --- | --- | --- | --- |
| Both | 2022 | 317.3229 | 4.03E-05 | 325.2158 | 311.76486 |
|  | 2023 | 312.5824 | 5.80E-05 | 323.9539 | 303.48961 |
|  | 2024 | 307.9525 | 8.07E-05 | 323.7768 | 294.34354 |
|  | 2025 | 303.3792 | 0.000107 | 324.3098 | 284.59475 |
|  | 2026 | 298.8013 | 0.000135 | 325.3277 | 274.34748 |
|  | 2027 | 294.2038 | 0.000166 | 326.7207 | 263.68377 |
|  | 2028 | 289.6999 | 0.000198 | 328.4995 | 252.82044 |
|  | 2029 | 285.274 | 0.000231 | 330.5819 | 241.80879 |
|  | 2030 | 280.9111 | 0.000265 | 332.9106 | 230.67577 |
|  | 2031 | 276.5944 | 0.0003 | 335.4448 | 219.4286 |
|  | 2032 | 272.3041 | 0.000336 | 338.1456 | 208.06709 |
|  | 2033 | 268.1053 | 0.000372 | 341.0417 | 196.69386 |
|  | 2034 | 263.9821 | 0.000409 | 344.0828 | 185.3274 |
|  | 2035 | 259.9207 | 0.000445 | 347.2332 | 173.97587 |
|  | 2036 | 255.9125 | 0.000482 | 350.4752 | 162.63928 |
|  | 2037 | 251.9335 | 0.00052 | 353.7736 | 151.30537 |
|  | 2038 | 248.0108 | 0.000557 | 357.1313 | 140.02537 |
|  | 2039 | 244.1365 | 0.000594 | 360.5162 | 128.81597 |
|  | 2040 | 240.3174 | 0.000631 | 363.9265 | 117.69204 |
| Male | 2022 | 580.6249 | 8.10E-05 | 596.5059 | 569.41888 |
|  | 2023 | 572.9085 | 0.000114 | 595.3385 | 555.00374 |
|  | 2024 | 565.3471 | 0.000157 | 596.2131 | 538.83145 |
|  | 2025 | 557.839 | 0.000207 | 598.4257 | 521.4099 |
|  | 2026 | 550.3361 | 0.000262 | 601.612 | 503.01146 |
|  | 2027 | 542.8402 | 0.00032 | 605.5882 | 483.82734 |
|  | 2028 | 535.5089 | 0.000382 | 610.3237 | 464.20478 |
|  | 2029 | 528.2898 | 0.000446 | 615.6455 | 444.21419 |
|  | 2030 | 521.1527 | 0.000512 | 621.4471 | 423.90217 |
|  | 2031 | 514.1068 | 0.00058 | 627.6976 | 403.31823 |
|  | 2032 | 507.133 | 0.000649 | 634.3423 | 382.4803 |
|  | 2033 | 500.3114 | 0.00072 | 641.39 | 361.5407 |
|  | 2034 | 493.5981 | 0.000792 | 648.7331 | 340.5203 |
|  | 2035 | 486.97 | 0.000864 | 656.3103 | 319.43507 |
|  | 2036 | 480.4415 | 0.000937 | 664.1279 | 298.3071 |
|  | 2037 | 473.9837 | 0.001011 | 672.1382 | 277.12629 |
|  | 2038 | 467.6081 | 0.001085 | 680.2967 | 255.96092 |
|  | 2039 | 461.2786 | 0.001159 | 688.5131 | 234.82957 |
|  | 2040 | 455.0016 | 0.001234 | 696.7747 | 213.75855 |
| Female | 2022 | 104.5087 | 1.30E-05 | 107.0633 | 101.9542 |
|  | 2023 | 102.306 | 1.78E-05 | 105.7871 | 98.82484 |
|  | 2024 | 100.1584 | 2.38E-05 | 104.825 | 95.49174 |
|  | 2025 | 98.07365 | 3.07E-05 | 104.0956 | 92.05175 |
|  | 2026 | 96.01083 | 3.83E-05 | 103.5089 | 88.5128 |
|  | 2027 | 93.95089 | 4.63E-05 | 103.0162 | 84.88556 |
|  | 2028 | 91.91477 | 5.45E-05 | 102.604 | 81.22555 |
|  | 2029 | 89.91873 | 6.30E-05 | 102.2689 | 77.56855 |
|  | 2030 | 87.97145 | 7.16E-05 | 102.0091 | 73.93379 |
|  | 2031 | 86.04131 | 8.03E-05 | 101.7828 | 70.2998 |
|  | 2032 | 84.10699 | 8.90E-05 | 101.5595 | 66.65449 |
|  | 2033 | 82.18715 | 9.77E-05 | 101.3435 | 63.0308 |
|  | 2034 | 80.29736 | 0.000106 | 101.1431 | 59.45165 |

**Continued Table S10.** Projections for ASDR, 2022-2040

| **Sex** | **Year** | **Mean** | **SD** | **Upper** | **Lower** |
| --- | --- | --- | --- | --- | --- |
| Female | 2035 | 78.44831 | 0.000115 | 100.9665 | 55.93012 |
|  | 2036 | 76.62131 | 0.000123 | 100.7889 | 52.45375 |
|  | 2037 | 74.80111 | 0.000132 | 100.5886 | 49.01358 |
|  | 2038 | 73.01028 | 0.00014 | 100.3849 | 45.63571 |
|  | 2039 | 71.26147 | 0.000148 | 100.1891 | 42.33386 |
|  | 2040 | 69.56006 | 0.000155 | 100.0075 | 39.11265 |

ASDR, age-standardized DALYs rate.

**Table S11.** Out-of-Sample Prediction Errors of BAPC Models Across Sex Groups

| **ASRs** | **Sex** | MAPE (%) |
| --- | --- | --- |
| ASMR | Both | 3.988793 |
|  | Male | 3.730401 |
|  | Female | 2.646291 |
| ASDR | Both | 3.549357 |
|  | Male | 3.126816 |
|  | Female | 2.347643 |

ASRs, age-standardized rates; ASMR, age-standardized mortality rate; ASDR, age-standardized DALYs rate; MAPE: Mean Absolute Percentage Error.
